# Supplementary material
Source: PubMed Central journal article supplement (PMC7577903)
Supplement: 41380_2018_282_MOESM2_ESM.pdf [file 41380_2018_282_MOESM2_ESM.pdf]

**Table S1.** Diagnostic codes comprising possible co-occurring psychiatric conditions considered in this study. A case was defined as having evidence for a condition if one or more codes from the list below was present in the available electronic medical records data.

| <b>Major depression and related conditions</b> |                                                                                      |
|------------------------------------------------|--------------------------------------------------------------------------------------|
| 296.2                                          | major depressive disorder single episode                                             |
| 296                                            | affective disorders                                                                  |
| 296.2                                          | major depressive disorder single episode unspecified degree                          |
| 296.21                                         | major depressive disorder single episode mild degree                                 |
| 296.22                                         | major depressive disorder single episode moderate degree                             |
| 296.23                                         | major depressive disorder single episode severe degree without psychotic behavior    |
| 296.24                                         | major depressive disorder single episode severe degree with psychotic behavior       |
| 296.25                                         | major depressive disorder single episode in partial or unspecified remission         |
| 296.26                                         | major depressive disorder single episode in full remission                           |
| 296.3                                          | major depressive disorder recurrent episode                                          |
| 296.3                                          | major depressive disorder recurrent episode unspecified degree                       |
| 296.31                                         | major depressive disorder recurrent episode mild degree                              |
| 296.32                                         | major depressive disorder recurrent episode moderate degree                          |
| 296.33                                         | major depressive disorder recurrent episode severe degree without psychotic behavior |
| 296.34                                         | major depressive disorder recurrent episode severe degree with psychotic behavior    |
| 296.35                                         | major depressive disorder recurrent episode in partial or unspecified remission      |
| 296.36                                         | major depressive disorder recurrent episode in full remission                        |
| 296.82                                         | atypical depressive disorder                                                         |
| 300.9                                          | unspecified nonpsychotic mental disorder                                             |
| 311                                            | depressive disorder not elsewhere classified                                         |
| 313.1                                          | misery and unhappiness disorder specific to childhood/adolescence                    |
| 300.4                                          | dysthymic disorder                                                                   |
| 301.1                                          | affective personality disorder                                                       |
| 301.1                                          | affective personality disorder unspecified                                           |
| 301.12                                         | chronic depressive personality disorder                                              |
| 648.4                                          | mental disorders complicating pregnancy childbirth or the puerperium                 |
| 648.4                                          | mental disorders of mother, unspecified episode                                      |
| 648.41                                         | mental disorders of mother, delivered, unspecified antepartum condition              |
| 648.42                                         | mental disorders of mother, delivered, with postpartum complication                  |
| 648.43                                         | mental disorders of mother, antepartum condition or complication                     |
| 648.44                                         | mental disorders of mother, postpartum condition or complication                     |
| <b>Bipolar Disorder and related conditions</b> |                                                                                      |
| 296                                            | bipolar I disorder, single episode, unspecified degree                               |
| 296.01                                         | bipolar I disorder, single episode, mild degree                                      |
| 296.02                                         | bipolar I disorder, single episode, moderate degree                                  |
| 296.03                                         | bipolar I disorder, single episode severe degree without psychotic behavior          |
| 296.04                                         | bipolar I disorder, single episode severe degree with psychotic behavior             |
| 296.05                                         | bipolar I disorder, single episode in partial or unspecified remission               |
| 296.06                                         | bipolar I disorder, single episode in full remission                                 |
| 296.1                                          | manic disorder recurrent episode                                                     |
| 296.1                                          | manic affective disorder recurrent episode unspecified degree                        |
| 296.11                                         | manic affective disorder recurrent episode mild degree                               |

|                          |                                                                                                         |
|--------------------------|---------------------------------------------------------------------------------------------------------|
| 296.12                   | manic affective disorder recurrent episode moderate degree                                              |
| 296.13                   | manic affective disorder recurrent episode severe degree without psychotic behavior                     |
| 296.14                   | manic affective disorder recurrent episode severe degree with psychotic behavior                        |
| 296.15                   | manic affective disorder recurrent episode in partial or unspecified remission                          |
| 296.16                   | manic affective disorder recurrent episode in full remission                                            |
| 296.4                    | bipolar I disorder, most recent episode (or current) manic                                              |
| 296.4                    | bipolar I disorder, most recent episode (or current) manic unspecified degree                           |
| 296.41                   | bipolar I disorder, most recent episode (or current) manic mild degree                                  |
| 296.42                   | bipolar I disorder, most recent episode (or current) manic moderate degree                              |
| 296.43                   | bipolar I disorder, most recent episode (or current) manic severe degree without psychotic behavior     |
| 296.44                   | bipolar I disorder, most recent episode (or current) manic severe degree with psychotic behavior        |
| 296.45                   | bipolar I disorder, most recent episode (or current) manic in partial or unspecified remission          |
| 296.46                   | bipolar I disorder, most recent episode (or current) manic in full remission                            |
| 296.5                    | bipolar I disorder, most recent episode (or current) depressed                                          |
| 296.5                    | bipolar I disorder, most recent episode (or current) depressed unspecified degree                       |
| 296.51                   | bipolar I disorder, most recent episode (or current) depressed mild degree                              |
| 296.52                   | bipolar I disorder, most recent episode (or current) depressed moderate degree                          |
| 296.53                   | bipolar I disorder, most recent episode (or current) depressed severe degree without psychotic behavior |
| 296.54                   | bipolar I disorder, most recent episode (or current) depressed severe degree with psychotic behavior    |
| 296.55                   | bipolar I disorder, most recent episode (or current) depressed in partial or unspecified remission      |
| 296.56                   | bipolar I disorder, most recent episode (or current) depressed in full remission                        |
| 296.6                    | bipolar I disorder, most recent episode (or current) mixed                                              |
| 296.6                    | bipolar I disorder, most recent episode (or current) mixed unspecified degree                           |
| 296.61                   | bipolar I disorder, most recent episode (or current) mixed mild degree                                  |
| 296.62                   | bipolar I disorder, most recent episode (or current) mixed moderate degree                              |
| 296.63                   | bipolar I disorder, most recent episode (or current) mixed severe degree without psychotic behavior     |
| 296.64                   | bipolar I disorder, most recent episode (or current) mixed severe degree with psychotic behavior        |
| 296.65                   | bipolar I disorder, most recent episode (or current) mixed in partial or unspecified remission          |
| 296.66                   | bipolar I disorder, most recent episode (or current) mixed in full remission                            |
| 296.7                    | bipolar I disorder, most recent episode (or current) unspecified                                        |
| 296.8                    | other and unspecified bipolar disorders                                                                 |
| 296.8                    | bipolar disorder, unspecified                                                                           |
| 296.81                   | atypical manic disorder                                                                                 |
| 296.89                   | bipolar disorder, other                                                                                 |
| 296.9                    | other and unspecified episodic mood disorder                                                            |
| 296.9                    | unspecified episodic mood disorder                                                                      |
| 296.99                   | other specified episodic mood disorder                                                                  |
| 301.13                   | cyclothymic disorder                                                                                    |
| 301.11                   | chronic hypomanic personality disorder                                                                  |
| <b>Anxiety disorders</b> |                                                                                                         |
| 300                      | anxiety states                                                                                          |
| 300                      | anxiety state, unspecified                                                                              |
| 300.01                   | panic disorder without agoraphobia                                                                      |
| 300.02                   | generalized anxiety disorder                                                                            |
| 300.09                   | other anxiety states                                                                                    |
| 300.1                    | dissociative, conversion, and factitious disorders                                                      |

|        |                                                                             |
|--------|-----------------------------------------------------------------------------|
| 300.1  | hysteria, unspecified                                                       |
| 300.11 | conversion disorder                                                         |
| 300.12 | dissociative amnesia                                                        |
| 300.13 | dissociative fugue                                                          |
| 300.14 | dissociative identity disorder                                              |
| 300.15 | dissociative disorder or reaction, unspecified                              |
| 300.2  | phobia, unspecified                                                         |
| 300.21 | agoraphobia with panic disorder                                             |
| 300.22 | agoraphobia without panic attacks                                           |
| 300.23 | social phobia                                                               |
| 300.29 | other isolated or specific phobias                                          |
| 300.3  | obsessive-compulsive disorders                                              |
| 313    | overanxious disorder, childhood/adolescence                                 |
| 313.2  | sensitivity shyness and social withdrawal specific to childhood/adolescence |
| 313.21 | shyness disorder of childhood                                               |
| 313.22 | introverted disorder of childhood                                           |
| 313.23 | selective mutism                                                            |
| 313.3  | relationship problems specific to childhood/adolescence                     |
| 300.6  | depersonalization disorder                                                  |
| F44    | Dissociative Disorders                                                      |
| 308    | acute reaction to stress                                                    |
| 308    | predominant disturbance of emotions                                         |
| 308.1  | predominant disturbance of consciousness                                    |
| 308.2  | predominant psychomotor disturbance                                         |
| 308.3  | other acute reactions to stress                                             |
| 308.4  | mixed disorders as reaction to stress                                       |
| 308.9  | unspecified acute reaction to stress                                        |
| 309    | adjustment disorder, depressive                                             |
| 309    | adjustment reaction                                                         |
| 309.1  | adjustment reaction with prolonged depressive reaction                      |
| 309.2  | adjustment reaction with disturbance of other emotion                       |
| 309.21 | adjustment reaction with separation anxiety                                 |
| 309.22 | adjustment reaction emancipation disorder of adolescence                    |
| 309.23 | adjustment reaction work inhibition                                         |
| 309.24 | adjustment reaction anxiety                                                 |
| 309.28 | adjustment reaction mixed anxiety and depressed mood                        |
| 309.29 | adjustment reaction other emotions                                          |
| 309.3  | adjustment reaction disturbance of conduct                                  |
| 309.4  | adjustment reaction mixed emotion and conduct                               |
| 309.8  | adjustment reaction other specified reaction                                |
| 309.82 | adjustment reaction with physical symptoms                                  |
| 309.83 | adjustment reaction with withdrawal                                         |
| 313.89 | other emotional disturbances of childhood or adolescence                    |
| 309.9  | adjustment reaction unspecified                                             |
| 313.8  | other or mixed emotional disturbances of childhood/adolescence              |
| 313.9  | unspecified emotional disturbance of childhood/adolescence                  |

|                                                   |                                                                          |
|---------------------------------------------------|--------------------------------------------------------------------------|
| 301                                               | paranoid personality disorder                                            |
| 301.21                                            | introverted personality                                                  |
| 313.82                                            | identity disorder of childhood/adolescence                               |
| <b>Psychotic disorders and related conditions</b> |                                                                          |
| 295                                               | schizophrenic disorders                                                  |
| 295                                               | simple type schizophrenia                                                |
| 295                                               | simple type schizophrenia unspecified state                              |
| 295.01                                            | simple type schizophrenia subchronic state                               |
| 295.02                                            | simple type schizophrenia chronic state                                  |
| 295.03                                            | simple type schizophrenia subchronic state with acute exacerbation       |
| 295.04                                            | simple type schizophrenia chronic state with acute exacerbation          |
| 295.05                                            | simple type schizophrenia in remission                                   |
| 295.1                                             | disorganized type schizophrenia                                          |
| 295.1                                             | disorganized type schizophrenia unspecified state                        |
| 295.11                                            | disorganized type schizophrenia subchronic state                         |
| 295.12                                            | disorganized type schizophrenia chronic state                            |
| 295.13                                            | disorganized type schizophrenia subchronic state with acute exacerbation |
| 295.14                                            | disorganized type schizophrenia chronic state with acute exacerbation    |
| 295.15                                            | disorganized type schizophrenia in remission                             |
| 295.2                                             | catatonic type schizophrenia                                             |
| 295.2                                             | catatonic type schizophrenia unspecified state                           |
| 295.21                                            | catatonic type schizophrenia subchronic state                            |
| 295.22                                            | catatonic type schizophrenia chronic state                               |
| 295.23                                            | catatonic type schizophrenia subchronic state with acute exacerbation    |
| 295.24                                            | catatonic type schizophrenia chronic state with acute exacerbation       |
| 295.25                                            | catatonic type schizophrenia in remission                                |
| 295.3                                             | paranoid type schizophrenia                                              |
| 295.3                                             | paranoid type schizophrenia unspecified state                            |
| 295.31                                            | paranoid type schizophrenia subchronic state                             |
| 295.32                                            | paranoid type schizophrenia chronic state                                |
| 295.33                                            | paranoid type schizophrenia subchronic state with acute exacerbation     |
| 295.34                                            | paranoid type schizophrenia chronic state with acute exacerbation        |
| 295.35                                            | paranoid type schizophrenia in remission                                 |
| 295.4                                             | schizophreniform disorder                                                |
| 295.4                                             | schizophreniform disorder unspecified state                              |
| 295.41                                            | schizophreniform disorder subchronic state                               |
| 295.42                                            | schizophreniform disorder chronic state                                  |
| 295.43                                            | schizophreniform disorder subchronic state with acute exacerbation       |
| 295.44                                            | schizophreniform disorder chronic state with acute exacerbation          |
| 295.45                                            | schizophreniform disorder in remission                                   |
| 295.5                                             | latent schizophrenia                                                     |
| 295.5                                             | latent schizophrenia unspecified state                                   |
| 295.51                                            | latent schizophrenia subchronic state                                    |
| 295.52                                            | latent schizophrenia chronic state                                       |
| 295.53                                            | latent schizophrenia subchronic state with acute exacerbation            |
| 295.54                                            | latent schizophrenia chronic state with acute exacerbation               |

|                                                       |                                                                                  |
|-------------------------------------------------------|----------------------------------------------------------------------------------|
| 295.55                                                | latent schizophrenia in remission                                                |
| 295.6                                                 | schizophrenic disorders, residual type                                           |
| 295.6                                                 | schizophrenic disorders, residual type unspecified state                         |
| 295.61                                                | schizophrenic disorders, residual type subchronic state                          |
| 295.62                                                | schizophrenic disorders, residual type chronic state                             |
| 295.63                                                | schizophrenic disorders, residual type subchronic state with acute exacerbation  |
| 295.64                                                | schizophrenic disorders, residual type chronic state with acute exacerbation     |
| 295.65                                                | schizophrenic disorders, residual type in remission                              |
| 295.7                                                 | schizoaffective disorder                                                         |
| 295.7                                                 | schizoaffective disorder, unspecified state                                      |
| 295.71                                                | schizoaffective disorder, subchronic state                                       |
| 295.72                                                | schizoaffective disorder, chronic state                                          |
| 295.73                                                | schizoaffective disorder, subchronic state with acute exacerbation               |
| 295.74                                                | schizoaffective disorder, chronic state with acute exacerbation                  |
| 295.75                                                | schizoaffective disorder, in remission                                           |
| 295.8                                                 | other specified types of schizophrenia                                           |
| 295.8                                                 | other specified types of schizophrenia, unspecified state                        |
| 295.81                                                | other specified types of schizophrenia, subchronic state                         |
| 295.82                                                | other specified types of schizophrenia, chronic state                            |
| 295.83                                                | other specified types of schizophrenia, subchronic state with acute exacerbation |
| 295.84                                                | other specified types of schizophrenia, chronic state with acute exacerbation    |
| 295.85                                                | other specified types of schizophrenia, in remission                             |
| 295.9                                                 | unspecified type schizophrenia                                                   |
| 295.9                                                 | unspecified type schizophrenia, unspecified state                                |
| 295.91                                                | unspecified type schizophrenia, subchronic state                                 |
| 295.92                                                | unspecified type schizophrenia, chronic state                                    |
| 295.93                                                | unspecified type schizophrenia, subchronic state with acute exacerbation         |
| 295.94                                                | unspecified type schizophrenia, chronic state with acute exacerbation            |
| 295.95                                                | unspecified type schizophrenia, in remission                                     |
| 301.2                                                 | schizoid personality disorder                                                    |
| 301.2                                                 | schizoid personality disorder, unspecified                                       |
| 301.22                                                | schizotypal personality disorder                                                 |
| <b>Substance use and abuse, and related disorders</b> |                                                                                  |
| 291                                                   | alcohol-induced mental disorders                                                 |
| 291                                                   | alcohol withdrawal delirium                                                      |
| 291.1                                                 | alcohol-induced persisting amnesic disorder                                      |
| 291.2                                                 | alcohol-induced persisting dementia                                              |
| 291.3                                                 | alcohol-induced psychotic disorder with hallucinations                           |
| 291.4                                                 | idiosyncratic alcohol intoxication                                               |
| 291.5                                                 | alcohol-induced psychotic disorder with delusions                                |
| 291.8                                                 | other specified alcohol-induced mental disorders                                 |
| 291.81                                                | alcohol withdrawal                                                               |
| 291.82                                                | alcohol-induced sleep disorder                                                   |
| 291.89                                                | other alcoholic psychosis                                                        |
| 291.9                                                 | unspecified alcohol-induced mental disorders                                     |
| 303                                                   | alcohol dependence syndrome                                                      |

|                                                     |                                                                           |
|-----------------------------------------------------|---------------------------------------------------------------------------|
| 303                                                 | acute alcoholic intoxication in alcoholism, unspecified drinking behavior |
| 303.01                                              | acute alcoholic intoxication in alcoholism, continuous drinking behavior  |
| 303.02                                              | acute alcoholic intoxication in alcoholism, episodic drinking behavior    |
| 303.03                                              | acute alcoholic intoxication in alcoholism, in remission                  |
| 303.9                                               | other and unspecified alcohol dependence                                  |
| 303.9                                               | other and unspecified alcohol dependence, unspecified drinking behavior   |
| 303.91                                              | other and unspecified alcohol dependence, continuous drinking behavior    |
| 303.92                                              | other and unspecified alcohol dependence, episodic drinking behavior      |
| 303.93                                              | other and unspecified alcohol dependence, in remission                    |
| v61.41                                              | alcoholism family                                                         |
| 305                                                 | nondependent alcohol abuse                                                |
| 305.01                                              | nondependent alcohol abuse, continuous drinking behavior                  |
| 305.02                                              | nondependent alcohol abuse, episodic drinking behavior                    |
| 305.03                                              | nondependent alcohol abuse, in remission                                  |
| V11.3                                               | personal history of alcoholism                                            |
| 304                                                 | drug dependence                                                           |
| 304                                                 | opioid type dependence                                                    |
| 304.1                                               | sedative, hypnotic or anxiolytic dependence                               |
| 304.2                                               | cocaine dependence                                                        |
| 304.3                                               | cannabis dependence                                                       |
| 304.4                                               | amphetamine and other psychostimulant dependence                          |
| 304.5                                               | hallucinogen dependence                                                   |
| 304.6                                               | other specified drug dependence                                           |
| 304.7                                               | combinations of opioid type drug with any other drug dependence           |
| 304.8                                               | combinations of drug dependence excluding opioid type drug                |
| 304.9                                               | unspecified drug dependence                                               |
| 305.2                                               | nondependent cannabis abuse                                               |
| 305.3                                               | nondependent hallucinogen abuse                                           |
| 305.4                                               | nondependent sedative, hypnotic, or anxiolytic abuse                      |
| 305.5                                               | nondependent opioid abuse                                                 |
| 305.6                                               | nondependent cocaine abuse                                                |
| 305.7                                               | nondependent amphetamine or related acting sympathomimetic abuse          |
| 305.8                                               | nondependent antidepressant type abuse                                    |
| v61.42                                              | substance abuse in family                                                 |
| v65.42                                              | counseling on substance use and abuse                                     |
| <b>Personality disorders and related conditions</b> |                                                                           |
| 301.4                                               | obsessive-compulsive personality disorders                                |
| 301.6                                               | dependent personality disorder                                            |
| 301.82                                              | avoidant personality disorder                                             |
| 301.7                                               | antisocial personality disorder                                           |
| 301.81                                              | narcissistic personality disorder                                         |
| 313.83                                              | academic underachievement disorder childhood/adolescence                  |
| 301.83                                              | borderline personality disorder                                           |
| 312                                                 | disturbance of conduct, not elsewhere classified                          |
| 312.9                                               | conduct disorder, unspecified                                             |
| 313.81                                              | oppositional defiant disorder                                             |

|                                           |                                                                                                                |
|-------------------------------------------|----------------------------------------------------------------------------------------------------------------|
| 301.5                                     | histrionic personality disorder                                                                                |
| 301.59                                    | other histrionic personality disorder                                                                          |
| 301.84                                    | passive-aggressive personality disorder                                                                        |
| 301.89                                    | other personality disorders                                                                                    |
| 301.9                                     | unspecified personality disorder                                                                               |
| 309.81                                    | post-traumatic stress disorder                                                                                 |
| <b>ADHD and impulse-related disorders</b> |                                                                                                                |
| 301.3                                     | explosive personality disorder                                                                                 |
| 312.3                                     | impulse control disorder, unspecified                                                                          |
| 312.31                                    | pathological gambling                                                                                          |
| 312.32                                    | kleptomania                                                                                                    |
| 312.33                                    | pyromania                                                                                                      |
| 312.34                                    | intermittent explosive disorder                                                                                |
| 312.35                                    | isolated explosive disorder                                                                                    |
| 314                                       | hyperkinetic syndrome of childhood                                                                             |
| 314                                       | attention deficit disorder                                                                                     |
| 314                                       | attention deficit w/o hyperactivity                                                                            |
| 314.01                                    | attention deficit w/ hyperactivity                                                                             |
| 314.9                                     | hyperkinetic conduct disorder                                                                                  |
| v69.2                                     | high-risk sexual behavior                                                                                      |
| v69.3                                     | gambling and betting                                                                                           |
| <b>Previous suicide attempt/ideation</b>  |                                                                                                                |
| V62.84                                    | suicidal ideation                                                                                              |
| E950                                      | suicide and self-inflicted poisoning by solid or liquid substances                                             |
| E950.0                                    | suicide and self-inflicted poisoning by analgesics/antipyretics/antirheumatics                                 |
| E950.1                                    | suicide and self-inflicted poisoning by barbiturates                                                           |
| E950.2                                    | suicide and self-inflicted poisoning by sedatives/hypnotics                                                    |
| E950.3                                    | suicide and self-inflicted poisoning by tranquilizers/psychotropics                                            |
| E950.4                                    | suicide and self-inflicted poisoning by other specified drugs, medicinal substances                            |
| E950.5                                    | suicide and self-inflicted poisoning by unspecified drug/medicinal substance                                   |
| E950.6                                    | suicide and self-inflicted poisoning by agricultural/horticultural chemical other than plant foods/fertilizers |
| E950.7                                    | suicide and self-inflicted poisoning by corrosive/caustic substances                                           |
| E950.8                                    | suicide and self-inflicted poisoning by arsenic                                                                |
| E950.9                                    | suicide and self-inflicted poisoning by other unspecified solid or liquid substances                           |
| E980.0                                    | poisoning by analgesics, antipyretics, and antirheumatics, motive undetermined                                 |
| E980.1                                    | poisoning by barbiturates, motive undetermined                                                                 |
| E980.2                                    | poisoning by sedatives and hypnotics, motive undetermined                                                      |
| E980.3                                    | poisoning by tranquilizers and other psychotropic agents, motive undetermined                                  |
| E980.4                                    | poisoning by other specified drugs and medicinal substances, motive undetermined                               |
| E980.7                                    | poisoning by agricultural chemical preparations other than plant foods and fertilizers, motive undetermined    |
| E980.8                                    | poisoning by arsenic and its compounds, motive undetermined                                                    |
| E980.9                                    | poisoning by other unspecified solid/liquid substance, motive undetermined                                     |
| E980.5                                    | poisoning by unspecified drug or medicinal substance, motive undetermined                                      |
| E951                                      | suicide and self-inflicted injury by gases in domestic use                                                     |
| E951.0                                    | suicide and self-inflicted injury by gas distributed by pipeline                                               |
| E951.1                                    | suicide and self-inflicted injury by liquefied petroleum in mobile containers                                  |

|        |                                                                                   |
|--------|-----------------------------------------------------------------------------------|
| E951.8 | suicide and self-inflicted injury by other utility gas                            |
| E952   | suicide and self-inflicted injury by other gases and vapors                       |
| E952.0 | suicide and self-inflicted injury by motor vehicle exhaust gas                    |
| E952.1 | suicide and self-inflicted injury by other carbon monoxide                        |
| E981   | poisoning by gases in domestic use undetermined accidental/purposely inflicted    |
| E982   | poisoning by other gases/domestic use undetermined accidental/purposely inflicted |
| E952.8 | suicide and self-inflicted injury by other specified gas                          |
| E952.9 | suicide and self-inflicted injury by unspecified gas/vapor                        |
| E953   | suicide and self-inflicted injury by hanging, strangulation, suffocation          |
| E953.0 | suicide and self-inflicted injury by hanging                                      |
| E953.1 | suicide and self-inflicted injury by suffocation by plastic bag                   |
| E953.8 | suicide and self-inflicted injury by other specified means                        |
| E953.9 | suicide and self-inflicted injury by unspecified means                            |
| E983   | hanging/strangulation/suffocation undetermined                                    |
| E984   | drowning, undetermined intent                                                     |
| E954   | suicide and self-inflicted injury by drowning                                     |
| E955   | suicide and self-inflicted injury by firearms/air guns/explosives                 |
| E955.0 | suicide and self-inflicted injury by handgun                                      |
| E955.1 | suicide and self-inflicted injury by shotgun                                      |
| E955.2 | suicide and self-inflicted injury by hunting rifle                                |
| E985   | injury firearms/explosives undetermined intent                                    |
| E955.3 | suicide and self-inflicted injury by military firearms                            |
| E955.4 | suicide and self-inflicted injury by other/unspecified firearm                    |
| E955.6 | suicide and self-inflicted injury by air gun                                      |
| E955.7 | suicide and self-inflicted injury by paintball gun                                |
| E955.9 | suicide and self-inflicted injury by firearms/explosives, unspecified             |
| E957   | suicide and self-inflicted injury by jumping from high places                     |
| E957.0 | suicide and self-inflicted injury by jumping from a residence                     |
| E957.1 | suicide and self-inflicted injury by jumping from other man-made structures       |
| E957.2 | suicide and self-inflicted injury by jumping from natural sites                   |
| E957.9 | suicide and self-inflicted injury by jumping from unspecified high place          |
| E987   | falling high place, undetermined intent                                           |
| E958.0 | suicide and self-inflicted injury by jumping or lying before a moving object      |
| E955.5 | suicide and self-inflicted injury by explosives                                   |
| E958.1 | suicide and self-inflicted injury by burns/fire                                   |
| E958.2 | suicide and self-inflicted injury by scald                                        |
| E958.4 | suicide and self-inflicted injury by electrocution                                |
| E958.7 | suicide and self-inflicted injury by caustic substances (except poisoning)        |
| E958.3 | suicide and self-inflicted injury by extremes of cold                             |
| E958.5 | suicide and self-inflicted injury by crashing of a motor vehicle                  |
| E958.6 | suicide and self-inflicted injury by crashing of aircraft                         |
| E956   | suicide and self-inflicted injury by cutting/piercing instrument                  |
| E986   | injury cutting/piercing, undetermined intent                                      |
| E988   | injury, unspecified means, undetermined intent                                    |
| E958.8 | suicide and self-inflicted injury by other specific means                         |
| E958.9 | suicide and self-inflicted injury by unspecified means                            |



|      |                                                  |
|------|--------------------------------------------------|
| E959 | late effects of self-injury                      |
| E989 | late effects of self-injury, undetermined intent |

**Table S2.** 207 Genes with coding or regulatory sequence in genomic regions with significant evidence for familial sharing from SGS analyses. Genes with previous associations with suicide risk are highlighted. Psychiatric and/or neuronal associations are in bold type.

| ENSEMBL ID      | chr | start     | end       | Gene Name                     | Association                                                                         | Coding Sequence within Region |
|-----------------|-----|-----------|-----------|-------------------------------|-------------------------------------------------------------------------------------|-------------------------------|
| ENSG00000168389 | 1   | 40420802  | 40435638  | <b>MFSD2A</b>                 | intellectual disability; speech disorders; neoplasms; microcephaly                  | YES                           |
| ENSG00000131236 | 1   | 40505905  | 40538321  | <i>CAP1</i>                   | nephropathy; cardiovascular; cancer                                                 | YES                           |
| ENSG00000131238 | 1   | 40538379  | 40563375  | <b>PPT1</b>                   | many psychiatric diagnoses                                                          | YES                           |
| ENSG00000162670 | 1   | 190066792 | 190446759 | <b>BRINP3</b>                 | suicide <sup>4</sup> ; smoking cessation; vascular inflammation; ulcerative colitis | NO                            |
| ENSG00000150681 | 1   | 192127587 | 192154945 | <b>RGS18</b>                  | suicide <sup>3</sup> ; anorexia; neuroticism; neoplasms                             | NO                            |
| ENSG00000170820 | 2   | 49189296  | 49381676  | <b>FSHR</b>                   | SSRI response                                                                       | NO                            |
| ENSG00000179915 | 2   | 50145643  | 51259674  | <b>NRXN1</b>                  | many psychiatric diagnoses                                                          | YES                           |
| ENSG00000115239 | 2   | 53759810  | 54087170  | <i>GPR75-ASB3</i>             | unknown                                                                             | NO                            |
| ENSG00000143942 | 2   | 53994929  | 54002333  | <i>CHAC2</i>                  | cardiovascular disease                                                              | NO                            |
| ENSG00000187699 | 2   | 190744335 | 191068210 | <i>C2orf88</i>                | juvenile arthritis                                                                  | YES                           |
| ENSG00000138379 | 2   | 190920423 | 190927455 | <i>MSTN</i>                   | body weight                                                                         | NO                            |
| ENSG00000198130 | 2   | 191054461 | 191208919 | <b>HIBCH</b>                  | cognitive delay; mental and motor retardation                                       | YES                           |
| ENSG00000151689 | 2   | 191208196 | 191236391 | <b>INPP1</b>                  | suicide <sup>7</sup> ; lithium response; neurodevelopment; autism                   | YES                           |
| ENSG00000151690 | 2   | 191273081 | 191373931 | <b>MFSD6</b>                  | ASD                                                                                 | YES                           |
| ENSG00000189362 | 2   | 191369068 | 191399448 | <i>TMEM194B (NEMP2)</i>       | Unknown                                                                             | YES                           |
| ENSG00000138386 | 2   | 191511472 | 191557492 | <b>NAB1</b>                   | neoplasms; nervous system diseases                                                  | YES                           |
| ENSG00000115419 | 2   | 191745553 | 191830278 | <b>GLS</b>                    | suicide <sup>6</sup> ; schizophrenia; glutamate synthesis                           | YES                           |
| ENSG00000115415 | 2   | 191829084 | 191885686 | <b>STAT1</b>                  | suicide <sup>5</sup> ; Alzheimer's, dementia; COPD; sclerosis                       | YES                           |
| ENSG00000138378 | 2   | 191894302 | 192016322 | <b>STAT4</b>                  | neuronal survival/regeneration; lupus; RA                                           | YES                           |
| ENSG00000153827 | 2   | 230628554 | 230787955 | <b>TRIP12</b>                 | intellectual disability/ASD                                                         | NO                            |
| ENSG00000153832 | 2   | 230787018 | 230877825 | <i>FBXO36</i>                 | unknown                                                                             | NO                            |
| ENSG00000163053 | 2   | 230899698 | 230933715 | <i>SLC16A14</i>               | immune diseases                                                                     | YES                           |
| ENSG00000135899 | 2   | 231032009 | 231090444 | <i>SP110</i>                  | immune diseases                                                                     | YES                           |
| ENSG00000079263 | 2   | 231067826 | 231223762 | <i>SP140</i>                  | immune diseases                                                                     | YES                           |
| ENSG00000067066 | 2   | 231280657 | 231408805 | <i>SP100</i>                  | immune diseases                                                                     | YES                           |
| ENSG00000135932 | 2   | 231577560 | 231685790 | <i>CAB39</i>                  | ischemic brain damage following stroke                                              | NO                            |
| ENSG00000163638 | 3   | 64501333  | 64673676  | <b>ADAMTS9</b>                | many psychiatric diagnoses                                                          | NO                            |
| ENSG00000151276 | 3   | 65339200  | 66024509  | <b>MAGI1</b>                  | mood disorders; schizophrenia; neuroticism                                          | NO                            |
| ENSG00000205981 | 3   | 180701497 | 180707562 | <i>DNAJC19</i>                | metabolic disorder; cardiovascular disease; nervous system disease                  | NO                            |
| ENSG00000181449 | 3   | 181429714 | 181432221 | <b>SOX2</b>                   | many psychiatric diagnoses                                                          | NO                            |
| ENSG00000270394 | 4   | 117220016 | 117221520 | <i>MTRNR2L13</i>              | unknown                                                                             | NO                            |
| ENSG00000174599 | 4   | 118004718 | 118006736 | <b>TRAM1L1</b>                | substance use disorders; type II diabetes                                           | YES                           |
| ENSG00000164100 | 4   | 118954773 | 119179803 | <b>NDST3</b>                  | schizophrenia; bipolar disorder                                                     | NO                            |
| ENSG00000151466 | 4   | 129786076 | 130014764 | <b>SCLT1</b>                  | problem ETOH use; cancer                                                            | NO                            |
| ENSG00000109794 | 4   | 187025573 | 187093821 | <i>FAM149A</i>                | unknown                                                                             | YES                           |
| ENSG00000269302 | 4   | 187111913 | 187112626 | <i>AC110771.1</i>             | unknown                                                                             | YES                           |
| ENSG00000145476 | 4   | 187112674 | 187134610 | <i>CYP4V2</i>                 | cardiovascular; immune and nervous system diseases                                  | YES                           |
| ENSG00000164344 | 4   | 187130133 | 187179625 | <i>KLKB1</i>                  | cardiovascular disease                                                              | YES                           |
| ENSG00000088926 | 4   | 187187099 | 187210835 | <b>F11</b>                    | many psychiatric diagnoses                                                          | YES                           |
| ENSG00000272297 | 4   | 187347700 | 187476464 | <b>PRPF31 (RP11-215A19.2)</b> | many psychiatric diagnoses                                                          | YES                           |
| ENSG00000168412 | 4   | 187454809 | 187476721 | <b>MTNR1A</b>                 | many psychiatric diagnoses                                                          | YES                           |
| ENSG00000198108 | 5   | 129240165 | 129522327 | <i>CHSY3</i>                  | colorectal cancer                                                                   | YES                           |
| ENSG00000169567 | 5   | 130494720 | 130507428 | <b>HINT1</b>                  | many psychiatric diagnoses                                                          | YES                           |

|                 |   |           |           |                 |                                                                                                                                    |     |
|-----------------|---|-----------|-----------|-----------------|------------------------------------------------------------------------------------------------------------------------------------|-----|
| ENSG00000186687 | 5 | 130506503 | 130541119 | <b>LYRM7</b>    | <b>brain disease</b>                                                                                                               | YES |
| ENSG00000158985 | 5 | 130581186 | 130734140 | <b>CDC42SE2</b> | <b>schizophrenia; neoplasms; immune system diseases</b>                                                                            | YES |
| ENSG00000158987 | 5 | 130759614 | 130970929 | <b>RAPGEF6</b>  | <b>schizophrenia; breast cancer</b>                                                                                                | YES |
| ENSG00000217128 | 5 | 130977407 | 131132710 | <b>FNIP1</b>    | <b>schizophrenia; neoplasms</b>                                                                                                    | YES |
| ENSG00000164398 | 5 | 131142683 | 131347936 | <b>ACSL6</b>    | <b>many psychiatric diagnoses</b>                                                                                                  | YES |
| ENSG00000164399 | 5 | 131396222 | 131398897 | <b>IL3</b>      | <b>many psychiatric diagnoses</b>                                                                                                  | YES |
| ENSG00000164400 | 5 | 131409483 | 131411859 | <b>CSF2</b>     | <b>schizophrenia in females; leukemia; inflammation; arthritis</b>                                                                 | YES |
| ENSG00000072682 | 5 | 131527531 | 131631008 | <i>P4HA2</i>    | arthritis; Chron's disease; neoplasms                                                                                              | YES |
| ENSG00000131435 | 5 | 131593364 | 131609147 | <i>PDLIM4</i>   | bone density; type II diabetes                                                                                                     | YES |
| ENSG00000197208 | 5 | 131630136 | 131679899 | <b>SLC22A4</b>  | <b>Schizophrenia</b>                                                                                                               | YES |
| ENSG00000197375 | 5 | 131705444 | 131731306 | <b>SLC22A5</b>  | <b>mood disorder; carnitine deficiency</b>                                                                                         | YES |
| ENSG00000197536 | 5 | 131746328 | 131811736 | <i>C5orf56</i>  | unknown                                                                                                                            | YES |
| ENSG00000125347 | 5 | 131817301 | 131826490 | <i>IRF1</i>     | Immune response; cancer                                                                                                            | YES |
| ENSG00000170231 | 5 | 159626114 | 159665666 | <i>FABP6</i>    | diabetes; digestive system diseases                                                                                                | YES |
| ENSG00000135083 | 5 | 159680385 | 159738930 | <i>CCN1L</i>    | unknown                                                                                                                            | YES |
| ENSG00000145861 | 5 | 159776175 | 159797644 | <i>C1QTNF2</i>  | unknown                                                                                                                            | YES |
| ENSG00000221886 | 5 | 159820713 | 159822497 | <i>ZBED8</i>    | unknown                                                                                                                            | YES |
| ENSG00000164609 | 5 | 159830292 | 159842301 | <b>SLU7</b>     | <b>ASD; Parkinson's</b>                                                                                                            | YES |
| ENSG00000164611 | 5 | 159849320 | 159855688 | <b>PTTG1</b>    | metabolic disorders; cancers; <b>ASD</b>                                                                                           | YES |
| ENSG00000118322 | 5 | 159992460 | 160115081 | <i>ATP10B</i>   | unknown                                                                                                                            | YES |
| ENSG00000255633 | 6 | 62284008  | 62284534  | <i>MTRNR2L9</i> | unknown                                                                                                                            | NO  |
| ENSG00000112232 | 6 | 62389865  | 62996132  | <b>KHDRBS2</b>  | <b>Alzheimers; melanoma</b>                                                                                                        | YES |
| ENSG00000198225 | 6 | 63921351  | 63922929  | <i>FKBP1C</i>   | unknown                                                                                                                            | YES |
| ENSG00000146166 | 6 | 63985856  | 64029882  | <b>LGSN</b>     | <b>male-specific MDD</b>                                                                                                           | YES |
| ENSG00000112245 | 6 | 64231666  | 64293492  | <b>PTP4A1</b>   | <b>stress/alcohol</b>                                                                                                              | NO  |
| ENSG00000203727 | 6 | 147830063 | 148058683 | <i>SAMD5</i>    | unknown                                                                                                                            | NO  |
| ENSG00000111961 | 6 | 148593440 | 148873186 | <i>SASH1</i>    | skin; digestive system diseases                                                                                                    | YES |
| ENSG00000111962 | 6 | 149068464 | 149398126 | <b>UST</b>      | <b>antidepressant response; endometriosis</b>                                                                                      | NO  |
| ENSG00000122584 | 7 | 8473585   | 8792593   | <b>NXPH1</b>    | <b>many psychiatric diagnoses</b>                                                                                                  | NO  |
| ENSG00000189043 | 7 | 10971578  | 10979883  | <i>NDUFA4</i>   | <b>Leigh Disease</b>                                                                                                               | NO  |
| ENSG00000006468 | 7 | 13930853  | 14031050  | <b>ETV1</b>     | <b>neuronal regulation/migration</b>                                                                                               | NO  |
| ENSG00000136267 | 7 | 14184674  | 15014402  | <b>DGKB</b>     | <b>many psychiatric diagnoses</b>                                                                                                  | YES |
| ENSG00000179144 | 7 | 150211918 | 150218161 | <i>GIMAP7</i>   | diabetes; blood disorder                                                                                                           | NO  |
| ENSG00000133574 | 7 | 150264365 | 150271041 | <i>GIMAP4</i>   | immune system diseases; diabetes                                                                                                   | YES |
| ENSG00000133561 | 7 | 150322463 | 150329473 | <i>GIMAP6</i>   | unknown                                                                                                                            | YES |
| ENSG00000106560 | 7 | 150382785 | 150390729 | <i>GIMAP2</i>   | unknown                                                                                                                            | YES |
| ENSG00000213203 | 7 | 150413645 | 150421372 | <i>GIMAP1</i>   | unknown                                                                                                                            | YES |
| ENSG00000196329 | 7 | 150419341 | 150447121 | <i>GIMAP5</i>   | immune system and digestive diseases; diabetes                                                                                     | YES |
| ENSG00000106565 | 7 | 150488373 | 150498448 | <b>TMEM176B</b> | <b>Alzheimers; neoplasms</b>                                                                                                       | YES |
| ENSG00000002933 | 7 | 150497491 | 150502208 | <i>TMEM176A</i> | unknown                                                                                                                            | YES |
| ENSG00000002726 | 7 | 150521715 | 150558592 | <b>AOC1</b>     | <b>Parkinson's; schizophrenia</b>                                                                                                  | YES |
| ENSG00000005518 | 7 | 150642049 | 150675403 | <b>KCNH2</b>    | <b>many psychiatric diagnoses</b>                                                                                                  | YES |
| ENSG00000164867 | 7 | 150688083 | 150711676 | <b>NOS3</b>     | <b>suicide<sup>10</sup>; bipolar; major depression; schizophrenia; inflammatory conditions; immune &amp; autoimmune conditions</b> | YES |
| ENSG00000181652 | 7 | 150709297 | 150721586 | <i>ATG9B</i>    | atherosclerosis; diabetes                                                                                                          | YES |
| ENSG00000197150 | 7 | 150725510 | 150744869 | <i>ABCB8</i>    | neoplasms                                                                                                                          | YES |
| ENSG00000213199 | 7 | 150745379 | 150749843 | <i>ASIC3</i>    | hyperalgesia; fibromyalgia; chronic fatigue syndrome                                                                               | YES |
| ENSG00000164885 | 7 | 150750899 | 150755617 | <b>CDK5</b>     | <b>suicide<sup>11</sup>; autism; Alzheimers; tobacco use disorder; diabetes; Crohn's; obesity</b>                                  | YES |
| ENSG00000164889 | 7 | 150754297 | 150773614 | <i>SLC4A2</i>   | Liver disease; cancer                                                                                                              | YES |
| ENSG00000164896 | 7 | 150773711 | 150777953 | <i>FASTK</i>    | blood disorder; deafness; neoplasms; myopathies                                                                                    | YES |

|                 |    |           |           |                      |                                                                                                                                                                 |     |
|-----------------|----|-----------|-----------|----------------------|-----------------------------------------------------------------------------------------------------------------------------------------------------------------|-----|
| ENSG00000164897 | 7  | 150778167 | 150780633 | <i>TMUB1</i>         | bone disease                                                                                                                                                    | YES |
| ENSG00000133612 | 7  | 150782918 | 150841523 | <b>AGAP3</b>         | <b>Schizophrenia</b>                                                                                                                                            | YES |
| ENSG00000164900 | 7  | 150845676 | 150871832 | <i>GBX1</i>          | cancer                                                                                                                                                          | YES |
| ENSG00000146926 | 7  | 150872785 | 150884919 | <b>ASB10</b>         | <b>suicide<sup>9</sup>; scleroderma; pulmonary hypertension</b>                                                                                                 | YES |
| ENSG00000033050 | 7  | 150904923 | 150924316 | <i>ABCF2</i>         | neoplasms                                                                                                                                                       | YES |
| ENSG00000033100 | 7  | 150929575 | 150935908 | <i>CHPF2</i>         | unknown                                                                                                                                                         | YES |
| ENSG00000082014 | 7  | 150935850 | 150974982 | <i>SMARCD3</i>       | cardiovascular disease; neoplasms                                                                                                                               | YES |
| ENSG00000013374 | 7  | 151038785 | 151075535 | <b>NUB1</b>          | <b>suicide; Parkinson's; Huntington's; diabetes</b>                                                                                                             | YES |
| ENSG00000187260 | 7  | 151072995 | 151107813 | <i>WDR86</i>         | unknown                                                                                                                                                         | YES |
| ENSG00000127377 | 7  | 151125921 | 151137899 | <i>CRYGN</i>         | unknown                                                                                                                                                         | YES |
| ENSG00000106615 | 7  | 151163098 | 151217206 | <b>RHEB</b>          | <b>suicide<sup>8</sup>; pain threshold</b>                                                                                                                      | YES |
| ENSG00000106617 | 7  | 151253197 | 151574210 | <b>PRKAG2</b>        | <b>suicide<sup>9</sup>; schizophrenia; drug toxicity; cardiovascular disease; diabetes</b>                                                                      | YES |
| ENSG00000173281 | 8  | 8993765   | 9009084   | <i>PPP1R3B</i>       | digestive system diseases; cardiovascular diseases; diabetes                                                                                                    | NO  |
| ENSG00000253426 | 8  | 9009252   | 9025646   | <i>RP11-10A14.4</i>  | unknown                                                                                                                                                         | NO  |
| ENSG00000173273 | 8  | 9413424   | 9639856   | <b>TNKS</b>          | <b>smoking behavior; blood pressure; cancer</b>                                                                                                                 | YES |
| ENSG00000175806 | 8  | 9911778   | 10286401  | <b>MSRA</b>          | <b>many psychiatric diagnoses</b>                                                                                                                               | YES |
| ENSG00000184647 | 8  | 10383056  | 10411676  | <b>PRSS55</b>        | <b>Parkinson's</b>                                                                                                                                              | NO  |
| ENSG00000185736 | 10 | 1228073   | 1779670   | <b>ADARB2</b>        | <b>dementia; substance disorders; neoplasms</b>                                                                                                                 | NO  |
| ENSG00000067057 | 10 | 3108525   | 3179904   | <i>PFKP</i>          | digestive system diseases; metabolic disorders; neoplasms                                                                                                       | NO  |
| ENSG00000026025 | 10 | 17270258  | 17279592  | <b>VIM</b>           | <b>suicide<sup>12</sup>; anorexia; bulimia; Alzheimer's; asthma; arthritis; Crohn's</b>                                                                         | NO  |
| ENSG00000148488 | 10 | 17360382  | 17496329  | <i>ST8SIA6</i>       | unknown                                                                                                                                                         | YES |
| ENSG00000165996 | 10 | 17631958  | 17659376  | <b>HACD1 (PTPLA)</b> | <b>Huntington's</b>                                                                                                                                             | NO  |
| ENSG00000165476 | 10 | 65281123  | 65384883  | <b>REEP3</b>         | <b>ASD</b>                                                                                                                                                      | NO  |
| ENSG00000183230 | 10 | 67672276  | 69455927  | <b>CTNNA3</b>        | <b>suicide<sup>8</sup>; Alzheimer's; Bipolar; major depression; schizophrenia; tobacco use disorder; inflammation; asthma; diabetes; cardiovascular disease</b> | YES |
| ENSG00000198739 | 10 | 68685764  | 68859588  | <b>LRRTM3</b>        | <b>ASD; Alzheimer's; amyloidosis</b>                                                                                                                            | NO  |
| ENSG00000025434 | 11 | 47269851  | 47290396  | <b>NR1H3</b>         | <b>Anorexia</b>                                                                                                                                                 | NO  |
| ENSG00000110514 | 11 | 47290712  | 47351582  | <b>MADD</b>          | <b>Alzheimer's; diabetes; cardiovascular diseases</b>                                                                                                           | YES |
| ENSG00000134571 | 11 | 47352957  | 47374253  | <i>MYBPC3</i>        | cardiovascular diseases                                                                                                                                         | YES |
| ENSG00000066336 | 11 | 47376411  | 47400127  | <b>SPI1</b>          | <b>methylation abnormalities in ASD</b>                                                                                                                         | YES |
| ENSG00000165915 | 11 | 47428683  | 47438047  | <b>SLC39A13</b>      | <b>Psychosis; cardiovascular disease; musculoskeletal disease</b>                                                                                               | YES |
| ENSG00000165916 | 11 | 47440320  | 47447993  | <i>PSMC3</i>         | immune system diseases                                                                                                                                          | YES |
| ENSG00000165917 | 11 | 47459308  | 47470730  | <i>RAPSN</i>         | myasthenic syndrome                                                                                                                                             | YES |
| ENSG00000149187 | 11 | 47487496  | 47587121  | <b>CELF1</b>         | <b>Alzheimers; neuromuscular disorder; MS; digestive and cardiovascular diseases</b>                                                                            | YES |
| ENSG00000213619 | 11 | 47586888  | 47606114  | <b>NDUF53</b>        | <b>many psychiatric diagnoses</b>                                                                                                                               | YES |
| ENSG00000110536 | 11 | 47586982  | 47595013  | <i>PTPMT1</i>        | unknown                                                                                                                                                         | YES |
| ENSG00000123444 | 11 | 47593749  | 47600567  | <i>KBTBD4</i>        | unknown                                                                                                                                                         | YES |
| ENSG00000196666 | 11 | 47608198  | 47610746  | <i>FAM180B</i>       | unknown                                                                                                                                                         | YES |
| ENSG00000172247 | 11 | 47611216  | 47616211  | <i>C1QTNF4</i>       | unknown                                                                                                                                                         | YES |
| ENSG00000109919 | 11 | 47638867  | 47664175  | <b>MTCH2</b>         | <b>hippocampal dysfunction; asthma; metabolic disorders</b>                                                                                                     | YES |
| ENSG00000165923 | 11 | 47681143  | 47736941  | <b>AGBL2</b>         | <b>mendelian neurologic disease; arthritis</b>                                                                                                                  | YES |
| ENSG00000109920 | 11 | 47738072  | 47788995  | <i>FNBP4</i>         | Unknown                                                                                                                                                         | YES |
| ENSG00000030066 | 11 | 47799639  | 47870107  | <b>NUP160</b>        | <b>Alzheimer's</b>                                                                                                                                              | YES |
| ENSG00000149177 | 11 | 48002113  | 48189670  | <i>PTPRJ</i>         | leptin resistance; fibrosis; cancer                                                                                                                             | YES |
| ENSG00000182053 | 11 | 49050504  | 49059579  | <i>TRIM49B</i>       | cancer                                                                                                                                                          | YES |
| ENSG00000214891 | 11 | 49075266  | 49080664  | <i>TRIM64C</i>       | unknown                                                                                                                                                         | YES |
| ENSG00000086205 | 11 | 49168187  | 49230222  | <b>FOLH1</b>         | <b>many psychiatric diagnoses</b>                                                                                                                               | YES |

|                 |    |          |          |                        |                                                                                                                                                                |     |
|-----------------|----|----------|----------|------------------------|----------------------------------------------------------------------------------------------------------------------------------------------------------------|-----|
| ENSG00000172927 | 11 | 69061605 | 69182494 | <b>MYEOV</b>           | ethanol consumption; neoplasms                                                                                                                                 | NO  |
| ENSG00000110092 | 11 | 69455855 | 69469242 | <b>CCND1</b>           | suicide <sup>1</sup> ; major depression; asthma; cardiovascular disease; rheumatoid arthritis                                                                  | NOF |
| ENSG00000162344 | 11 | 69513000 | 69519410 | <b>FGF19</b>           | regulates proneural genes; Neoplasms                                                                                                                           | YES |
| ENSG00000075388 | 11 | 69587797 | 69590171 | <i>FGF4</i>            | embryonic development; cell survival                                                                                                                           | YES |
| ENSG00000186895 | 11 | 69624992 | 69633792 | <b>FGF3</b>            | sensory neuropathy                                                                                                                                             | YES |
| ENSG00000131620 | 11 | 69924408 | 70035634 | <i>ANO1</i>            | neoplasms; cystic fibrosis                                                                                                                                     | YES |
| ENSG00000168040 | 11 | 70049269 | 70053496 | <b>FADD</b>            | dementia; obesity                                                                                                                                              | NO  |
| ENSG00000165966 | 12 | 41582250 | 41968392 | <i>PDZRN4</i>          | lung disease                                                                                                                                                   | YES |
| ENSG00000151233 | 12 | 42475647 | 42538681 | <b>GXYLT1</b>          | suicide <sup>9</sup>                                                                                                                                           | NO  |
| ENSG00000132938 | 13 | 29598748 | 30077892 | <b>MTUS2</b>           | nervous system development                                                                                                                                     | YES |
| ENSG00000139514 | 13 | 30083547 | 30169825 | <i>SLC7A1</i>          | neoplasms; cardiovascular and digestive disease                                                                                                                | YES |
| ENSG00000122042 | 13 | 30338508 | 30424821 | <i>UBL3</i>            | iron metabolism disorder                                                                                                                                       | YES |
| ENSG00000102781 | 13 | 30776767 | 30881621 | <i>KATNAL1</i>         | Unknown                                                                                                                                                        | NO  |
| ENSG00000102468 | 13 | 47405685 | 47471169 | <b>HTR2A</b>           | suicide <sup>13-20</sup> ; affective disorders; alcoholism; Alzheimer's; anxiety; bipolar; eating disorders; pain; psychosis; schizophrenia; Tourette syndrome | NO  |
| ENSG00000136143 | 13 | 48510622 | 48612125 | <b>SUCLA2</b>          | many psychiatric diagnoses; mitochondrial disorder                                                                                                             | YES |
| ENSG00000136159 | 13 | 48611703 | 48621358 | <i>NUDT15</i>          | digestive system and skin diseases                                                                                                                             | YES |
| ENSG00000136146 | 13 | 48627459 | 48669267 | <i>MED4</i>            | endometriosis; neoplasms                                                                                                                                       | YES |
| ENSG00000136156 | 13 | 48807294 | 48837063 | <b>ITM2B</b>           | many psychiatric diagnoses                                                                                                                                     | YES |
| ENSG00000139687 | 13 | 48877887 | 49056122 | <b>RB1</b>             | many psychiatric diagnoses                                                                                                                                     | YES |
| ENSG00000139679 | 13 | 48963707 | 49018840 | <i>LPAR6</i>           | alopecia; cancer                                                                                                                                               | YES |
| ENSG00000136161 | 13 | 49063095 | 49107369 | <i>RCBTB2</i>          | immune system diseases; neoplasms                                                                                                                              | YES |
| ENSG00000152207 | 13 | 49280951 | 49283498 | <i>CYSLTR2</i>         | vagal sensation; inflammation response                                                                                                                         | YES |
| ENSG00000102531 | 13 | 49550048 | 49783915 | <b>FNDC3A</b>          | Frontotemporal Lobar Degeneration; bipolar disorder                                                                                                            | NO  |
| ENSG00000100614 | 14 | 60712566 | 60759200 | <i>PPM1A</i>           | amyloidosis; neoplasms                                                                                                                                         | YES |
| ENSG00000179008 | 14 | 60903563 | 60951796 | <i>C14orf39</i>        | unknown                                                                                                                                                        | YES |
| ENSG00000184302 | 14 | 60976117 | 60977970 | <i>SIX6</i>            | development                                                                                                                                                    | YES |
| ENSG00000100625 | 14 | 61180125 | 61190792 | <i>SIX4</i>            | development                                                                                                                                                    | YES |
| ENSG00000020426 | 14 | 61201581 | 61435067 | <b>MNAT1</b>           | many psychiatric diagnoses                                                                                                                                     | YES |
| ENSG00000126814 | 14 | 61441827 | 61447691 | <i>TRMT5</i>           | mitochondrial disorders                                                                                                                                        | YES |
| ENSG00000139974 | 14 | 61447996 | 61519147 | <i>SLC38A6</i>         | Neoplasms                                                                                                                                                      | YES |
| ENSG00000182107 | 14 | 61746810 | 61747865 | <i>TMEM30B</i>         | neoplasms                                                                                                                                                      | YES |
| ENSG00000027075 | 14 | 61909885 | 62016549 | <b>PRKCH</b>           | suicide <sup>1</sup> ; major depression; tobacco use disorder; rheumatoid arthritis                                                                            | YES |
| ENSG00000100644 | 14 | 62162523 | 62214977 | <b>HIF1A</b>           | many psychiatric diagnoses                                                                                                                                     | YES |
| ENSG00000023608 | 14 | 62229179 | 62261701 | <i>SNAPC1</i>          | neoplasms                                                                                                                                                      | YES |
| ENSG00000128918 | 15 | 58245622 | 58790065 | <b>ALDH1A2</b>         | Schizophrenia; Alzheimer's                                                                                                                                     | YES |
| ENSG00000103569 | 15 | 58430368 | 58478110 | <b>AQP9</b>            | response to TBI                                                                                                                                                | NO  |
| ENSG00000166035 | 15 | 58702768 | 58861151 | <b>LIPC</b>            | Alzheimer's; dementia                                                                                                                                          | YES |
| ENSG00000137845 | 15 | 58887403 | 59042177 | <b>ADAM10</b>          | many psychiatric diagnoses                                                                                                                                     | YES |
| ENSG00000128923 | 15 | 59063391 | 59154099 | <b>MINDY2 (FAM63B)</b> | suicide; cognition in schizophrenia                                                                                                                            | YES |
| ENSG00000157450 | 15 | 59157374 | 59389618 | <i>RNF111</i>          | asthma; cardiovascular diseases ; Neoplasms                                                                                                                    | YES |
| ENSG00000137776 | 15 | 59171244 | 59225852 | <i>SLTM</i>            | Unknown                                                                                                                                                        | YES |
| ENSG00000157456 | 15 | 59397277 | 59417244 | <i>CCNB2</i>           | Cell growth control; cancer                                                                                                                                    | YES |
| ENSG00000157483 | 15 | 59427113 | 59665099 | <i>MYO1E</i>           | urogenital diseases; neoplasms; respiratory diseases                                                                                                           | YES |
| ENSG00000171989 | 15 | 59499042 | 59500705 | <i>LDHAL6B</i>         | Neoplasms                                                                                                                                                      | YES |
| ENSG00000157470 | 15 | 59664892 | 59815748 | <i>FAM81A</i>          | Unknown                                                                                                                                                        | NO  |
| ENSG00000171914 | 15 | 62682725 | 63136830 | <b>TLN2</b>            | epilepsy; neoplasms                                                                                                                                            | YES |
| ENSG00000140416 | 15 | 63334831 | 63364114 | <i>TPM1</i>            | Cardiomyopathy                                                                                                                                                 | YES |
| ENSG00000103642 | 15 | 63413999 | 63434260 | <i>LACTB</i>           | Obesity                                                                                                                                                        | YES |
| ENSG00000185088 | 15 | 63418071 | 63450220 | <i>RPS27L</i>          | Neoplasms                                                                                                                                                      | YES |

|                 |    |          |          |                |                                                                                  |     |
|-----------------|----|----------|----------|----------------|----------------------------------------------------------------------------------|-----|
| ENSG00000166128 | 15 | 63481668 | 63559981 | <b>RAB8B</b>   | <b>antidepressant effects; presenilin; depression; digestive system diseases</b> | YES |
| ENSG00000138613 | 15 | 63568217 | 63601325 | <b>APH1B</b>   | <b>Parkinson's; Alzheimer's; cardiovascular diseases; immune diseases</b>        | YES |
| ENSG00000074410 | 15 | 63613577 | 63674360 | <b>CA12</b>    | hyperchlorhidrosis                                                               | YES |
| ENSG00000140455 | 15 | 63796793 | 63886839 | <b>USP3</b>    | heart failure                                                                    | NO  |
| ENSG00000134504 | 18 | 24034874 | 24237365 | <b>KCTD1</b>   | skin disorders; neoplasms                                                        | NO  |
| ENSG00000171885 | 18 | 24432002 | 24445782 | <b>AQP4</b>    | <b>many psychiatric diagnoses</b>                                                | YES |
| ENSG00000154080 | 18 | 24495595 | 24765281 | <b>CHST9</b>   | Neoplasms                                                                        | NO  |
| ENSG0000012124  | 19 | 35820072 | 35838264 | <b>CD22</b>    | <b>many psychiatric diagnoses</b>                                                | YES |
| ENSG00000126266 | 19 | 35842455 | 35843357 | <b>FFAR1</b>   | diabetes; obesity; digestive system diseases; neoplasms                          | YES |
| ENSG00000185897 | 19 | 35849793 | 35850833 | <b>FFAR3</b>   | Inflammation; obesity                                                            | YES |
| ENSG00000126262 | 19 | 35940617 | 35941609 | <b>FFAR2</b>   | Inflammation                                                                     | YES |
| ENSG00000188408 | 19 | 35978330 | 35981344 | <b>KRTDAP</b>  | Unknown                                                                          | YES |
| ENSG00000161249 | 19 | 35989618 | 36004377 | <b>DMKN</b>    | skin disease; neoplasms                                                          | YES |
| ENSG00000189001 | 19 | 36014412 | 36019183 | <b>SBSN</b>    | Neoplasms                                                                        | YES |
| ENSG00000105679 | 19 | 36024430 | 36036072 | <b>GAPDHS</b>  | <b>Alzheimer's</b>                                                               | YES |
| ENSG00000105677 | 19 | 36036642 | 36038349 | <b>TMEM147</b> | Unknown                                                                          | YES |
| ENSG00000105675 | 19 | 36041517 | 36054531 | <b>ATP4A</b>   | <b>many psychiatric diagnoses</b>                                                | YES |
| ENSG00000249115 | 19 | 36103697 | 36113895 | <b>HAUSS</b>   | Unknown                                                                          | YES |
| ENSG00000126254 | 19 | 36120056 | 36128456 | <b>RBM42</b>   | Unknown                                                                          | YES |
| ENSG00000105672 | 19 | 36133363 | 36135754 | <b>ETV2</b>    | Unknown                                                                          | YES |

#### Detail of 18 genes with prior suicide evidence.

*RGS18* and *BRINP3*, have regulatory sequence within the region on chromosome 1q31.1–31.2. *RGS18* is significantly associated with serious suicide attempts from a study of major depression,<sup>1</sup> and is also significantly associated with neuroticism and a mouse model of emotionality.<sup>2</sup> *RGS18* controls platelet function; platelets play an important role in inflammation.<sup>3</sup> *BRINP3* (*FAM5C*) is associated with suicidal ideation,<sup>4</sup> and also heart disease, vascular inflammation,<sup>5</sup> peri-implantitis<sup>6</sup> and ulcerative colitis.<sup>7</sup>

*STAT1*, *GLS* and *INPP1* have coding sequence in the chromosome 2q32.2-q32.3 shared region. *STAT1* is a transcription activator regulated by interferon-alpha (IFN-alpha); treatment with IFN-alpha is known to result in serious neuropsychiatric complications.<sup>8</sup> *STAT1* gene expression is significantly increased in individuals with severe depression, and in postmortem brain tissue of individuals who died by suicide.<sup>9</sup> *STAT1* has been implicated in the auto-inflammatory disorder, atypical neutrophilic dermatosis,<sup>10</sup> vascular inflammation<sup>11</sup> and has multiple immune system functions.<sup>12,13</sup> *GLS* is involved in removing glutamate, an excitatory neurotransmitter, from synapses in the brain and has downregulated expression in both suicide and depressed patients<sup>14</sup> and also influences immune function.<sup>15</sup> *INPP1* is involved intracellular signaling; *INPP1* variants are associated with an increased risk of suicide attempts in patients with bipolar disorder.<sup>14</sup>

*INPP1* is also involved in lithium response<sup>16</sup> and with the autoimmune disorders, systemic lupus erythematosus and Sjögren's syndrome<sup>17</sup>

The genes *NUB1*, *RHEB*, *PRKAG2*, *ASB10*, *NOS3* and *CDK5* all have coding sequence in the chromosome 7q36.1 shared region. Of note, evidence for these co-located genes emerged from studies with different ascertainment and methods. *NUB1* has increased expression in the blood of males with bipolar disorder who died by suicide.<sup>18</sup> *RHEB* is involved in rapamycin (mTOR) signaling and has been implicated in a study of suicidal thoughts following antidepressant treatment.<sup>19</sup> In addition, *RHEB* is part of the signaling pathway involved in the action of the antidepressant ketamine<sup>20</sup> and has been implicated in the induction of allergic asthma.<sup>21</sup> *PRKAG2* and *ASB10* have been identified as candidate genes in suicide cases with major depressive disorder through identification of rare disruptive protein variants in whole exome sequencing.<sup>22</sup> *PRKAG2* is associated with the chronic inflammatory skin disease, atopic dermatitis,<sup>23</sup> and *ASB10* with the autoimmune disorder, systemic sclerosis.<sup>24</sup> *NOS3* is involved in neurotransmission; variants in this gene have been associated with suicide behavior.<sup>25</sup> *NOS3* has also been implicated in asthma, inflammatory bowel disease and arthritis<sup>26</sup> The *CDK5* gene is involved in neuronal migration and synaptic plasticity; this gene has shown increased expression in the prefrontal cortex of individuals who died by suicide.<sup>27</sup> The CDK5 pathway has also been implicated in behavioral changes following chronic stressors in a mouse model,<sup>28</sup> in stress-induced neuronal cell death<sup>29</sup> and in neuroinflammation.<sup>30</sup>

*VIM* has regulatory sequence in the chromosome shared region 10p12.33. This gene encodes a cytoskeletal structural protein that maintains cell shape. *VIM* gene expression was found to be upregulated in the amygdala of suicide cases<sup>31</sup> and has been associated with schizophrenia,<sup>32</sup> Alzheimer's<sup>33</sup> and rheumatoid arthritis.<sup>34</sup>

The *CTNNA3* gene has coding sequence in the chromosome 10q21.3 shared region. A SNP in this gene was one of the most significant findings for suicide attempt in the large genome-wide study of suicidal behavior.<sup>4</sup> This gene has also been implicated in both heart disease and asthma,<sup>35</sup> again suggesting a role of inflammation risk in suicide.

*CCND1* has regulatory sequence in the chromosome shared region 11q13.3 and has significantly decreased gene expression in veterans who have attempted suicide compared with veterans who have never attempted suicide.<sup>36</sup> *CCND1* has also been associated with Alzheimer's Disease<sup>37</sup>, schizophrenia<sup>38</sup> anxiety<sup>39</sup> and rheumatoid arthritis<sup>40</sup>

*GXYLT1* is a xylosyltransferase that has regulatory sequence in the shared SGS region on chromosome 12q12. Whole exome sequencing of Hungarian suicide cases with major depressive disorder identified that four of 23 suicide

cases had rare variants in *GXYLT1* compared to controls without psychiatric diagnoses who did not die by suicide.<sup>22</sup>

The *HTR2A* serotonin receptor gene has regulatory sequence in the shared region on chromosome 13q14.2 and is considered a strong suicide biomarker with replicated functional evidence for involvement in suicidality.<sup>18</sup> Serotonin is a neurotransmitter that has been implicated in both suicide and several psychiatric disorders.<sup>41,42</sup> Suicide risk may be tied to the association between *HTR2A* and response to antidepressant treatment.<sup>43</sup> *HTR2A* is also involved in the regulation of immune response.<sup>44</sup>

*PRKCH* has coding sequence in the chromosome shared region 14q23.1-q23.2; mutations in this gene are associated with susceptibility to cerebral infarction. *PRKCH* has significantly increased gene expression in veterans who have attempted suicide compared with veterans who have never attempted suicide.<sup>36</sup> *PRKCH* is also involved in rheumatoid arthritis<sup>45</sup>

*MINDY2 (FAM63B)* has coding sequence in the chromosome shared region 15q21.3 – q22.2. *MINDY2* had significantly decreased gene expression in a cohort of 45 suicide completers with varying psychiatric diagnoses<sup>18</sup> and is also associated with bipolar disorder<sup>46</sup> and schizophrenia.<sup>47</sup>



**Table S3.** Significant SGS regions in relation to previous linkage studies on suicidal ideation and behaviors.

| Study                                                                                            | Analysis Type | Genome Wide Sig. | Chr. | Region         | Marker  | Region Start (GRCh37/hg19) | Region Stop (GRCh37/hg19) |
|--------------------------------------------------------------------------------------------------|---------------|------------------|------|----------------|---------|----------------------------|---------------------------|
| This study                                                                                       | SGS           | N                | 1    | 1p34.2         | NA      | 40,433,771.00              | 40,555,321.00             |
| This study                                                                                       | SGS           | N                | 1    | 1q31.1 – q31.2 | NA      | 190,694,813.00             | 191,590,362.00            |
| Suicide attempts or a quantitative suicidality index in alcohol dependent families <sup>30</sup> | Linkage       | N                | 1    | 1q41           | D1S1602 | 215,095,408.00             | 215,295,710.00            |
| This study                                                                                       | SGS           | Y                | 2    | 2p16.3         | NA      | 50,902,522.00              | 51,820,543.00             |
| Recurrent early-onset MDD with suicide attempt included as a covariate <sup>31</sup>             | Linkage       | N                | 2    | 2p12           | D2S1777 | 78,420,289.00              | 78,620,740.00             |
| BD with suicide attempt included as a covariate <sup>32</sup>                                    | Linkage       | Y                | 2    | 2p12           | D2S1777 | 78,420,289.00              | 78,620,740.00             |
| Suicidality in MDD <sup>33</sup>                                                                 | Linkage       | N                | 2    | 2p12           | D2S428  | 82,881,763.00              | 83,082,057.00             |
| Suicide attempts or a quantitative suicidality index in alcohol dependent families <sup>30</sup> | Linkage       | Y                | 2    | 2p11.2         | D2S1790 | 84,975,280.00              | 85,175,634.00             |
| BD, psychosis, suicidal behavior, panic disorder <sup>34</sup>                                   | Linkage       | N                | 2    | 2q24.1         | D2S1353 | 159,458,931.00             | 159,659,082.00            |
| This study                                                                                       | SGS           | N                | 2    | 2q32.2 – q32.3 | NA      | 191,029,604.00             | 192,020,729.00            |
| This study                                                                                       | SGS           | Y                | 2    | 2q36.3 – q37.1 | NA      | 230,899,765.00             | 231,454,354.00            |
| Suicidality in MDD <sup>33</sup>                                                                 | Linkage       | N                | 3    | 3p14.2         | D3S1234 | 60,007,362.00              | 60,207,549.00             |
| This study                                                                                       | SGS           | Y                | 3    | 3p14.1         | NA      | 64,735,531.00              | 65,289,530.00             |
| This study                                                                                       | SGS           | N                | 3    | 3q26.33        | NA      | 181,074,751.00             | 181,229,833.00            |
| Suicide attempts or a quantitative suicidality index in alcohol dependent families <sup>30</sup> | Linkage       | N                | 3    | 3q26           | D3S2398 | 189,320,989.00             | 189,521,304.00            |
| BD, psychosis, suicidal behaviour, panic disorder <sup>34</sup>                                  | Linkage       | N                | 4    | 4p16.1         | D4S2366 | 6,384,678.00               | 6,584,947.00              |
| This study                                                                                       | SGS           | Y                | 4    | 4q26           | NA      | 117,379,825.00             | 118,257,841.00            |
| This study                                                                                       | SGS           | Y                | 4    | 4q28.3         | NA      | 131,561,136.00             | 132,902,055.00            |
| This study                                                                                       | SGS           | N                | 4    | 4q35.1 – q35.2 | NA      | 187,072,383.00             | 187,513,585.00            |
| This study                                                                                       | SGS           | Y                | 5    | 5q23.3 – q31.1 | NA      | 129,199,151.00             | 131,819,921.00            |
| This study                                                                                       | SGS           | N                | 5    | 5q23.3 – q31.1 | NA      | 129,684,909.00             | 131,819,921.00            |
| Recurrent early-onset MDD with suicide attempt included as a covariate <sup>31</sup>             | Linkage       | Y                | 5    | 5q31 – q33     | D5S1480 | 144,043,648.00             | 144,243,979.00            |
| This study                                                                                       | SGS           | Y                | 5    | 5q33.3 – q34   | NA      | 159,633,484.00             | 160,328,128.00            |
| BD, psychosis, suicidal behaviour, panic disorder <sup>34</sup>                                  | Linkage       | N                | 6    | 6q24.3         | D6S1848 | 35,976,225.00              | 36,176,624.00             |
| This study                                                                                       | SGS           | Y                | 6    | 6q11.1 – q12   | NA      | 62,563,817.00              | 64,139,997.00             |
| Recurrent early-onset MDD with suicide attempt included as a covariate <sup>31</sup>             | Linkage       | N                | 6    | 6q12           | D6S1053 | 64,490,155.00              | 64,690,642.00             |
| This study                                                                                       | SGS           | Y                | 6    | 6q24.3         | NA      | 148,162,328.00             | 148,621,930.00            |

|                                                                                      |         |   |    |                 |          |                |                |
|--------------------------------------------------------------------------------------|---------|---|----|-----------------|----------|----------------|----------------|
| BD, psychosis, suicidal behaviour, panic disorder <sup>34</sup>                      | Linkage | N | 6  | 6q25.2          | D6S2436  | 154,036,056.00 | 154,236,509.00 |
| This study                                                                           | SGS     | Y | 7  | 7p21.2          | NA       | 14,144,663.00  | 15,001,308.00  |
| This study                                                                           | SGS     | N | 7  | 7q36.1          | NA       | 150,239,676.00 | 151,123,529.00 |
| This study                                                                           | SGS     | N | 8  | 8p23.1          | NA       | 9,157,884.00   | 10,032,894.00  |
| Recurrent early-onset MDD with suicide attempt included as a covariate <sup>31</sup> | Linkage | N | 8  | 8p22 – p21      | D8S1145  | 18,252,480.00  | 18,452,816.00  |
| Suicidality in MDD <sup>33</sup>                                                     | Linkage | N | 9  | 9p24.3          | D9S1779  | 416,800.00     | 617,069.00     |
| This study                                                                           | SGS     | Y | 10 | 10p15.3         | NA       | 2,408,852.00   | 2,881,331.00   |
| This study                                                                           | SGS     | N | 10 | 10p12.33        | NA       | 17,391,660.00  | 17,576,227.00  |
| This study                                                                           | SGS     | N | 10 | 10q21.3         | NA       | 67,735,584.00  | 68,057,063.00  |
| BD, psychosis, suicidal behaviour, panic disorder <sup>34</sup>                      | Linkage | N | 10 | 10q25.3         | D10S1237 | 116,019,979.00 | 116,220,583.00 |
| This study                                                                           | SGS     | Y | 11 | 11p11.2 – q12.1 | NA       | 47,312,689.00  | 56,518,769.00  |
| This study                                                                           | SGS     | Y | 11 | 11q13.3         | NA       | 69,482,091.00  | 69,933,696.00  |
| Recurrent early-onset MDD with suicide attempt included as a covariate <sup>31</sup> | Linkage | Y | 11 | 11q25           | D11S968  | 133,718,376.00 | 133,918,617.00 |
| This study                                                                           | SGS     | N | 12 | 12q12           | NA       | 41,899,312.00  | 42,298,882.00  |
| This study                                                                           | SGS     | Y | 13 | 13q12.3         | NA       | 29,886,987.00  | 30,492,217.00  |
| This study                                                                           | SGS     | N | 13 | 13q14.2         | NA       | 48,526,833.00  | 49,283,795.00  |
| This study                                                                           | SGS     | Y | 15 | 15q21.3 – q22.2 | NA       | 58,601,804.00  | 59,646,991.00  |
| This study                                                                           | SGS     | Y | 15 | 15q22.2         | NA       | 62,914,165.00  | 63,686,327.00  |
| Suicidality in MDD <sup>33</sup>                                                     | Linkage | N | 15 | 15q23           | D15S145  | 70,761,176.00  | 70,961,309.00  |
| This study                                                                           | SGS     | N | 18 | 18q11.2         | NA       | 24,414,687.00  | 24,494,344.00  |
| Suicidality in MDD <sup>33</sup>                                                     | Linkage | N | 18 | 18q22.1         | D18S979  | 65,810,092.00  | 66,010,388.00  |

**Table S4.** Genes with existing evidence for association with suicide risk (TableS4\_Suicide-Genes-Literature.xlsx).

| PUBMED ID          | REFERENCE                                     | SOURCE TYPE                     | GENE     |
|--------------------|-----------------------------------------------|---------------------------------|----------|
| 26666204           | Sokolowski et al. 2016                        | GWAS                            | A1CF     |
| 28769055           | Tombacz et al. 2017                           | WES Study                       | AADACL2  |
| 25178164           | Sokolowski et al. 2015                        | Review Article                  | ABCB1    |
| 29331709           | Bozorgmehr et al. 2018                        | Review Article                  | ABCG1    |
| 28769055           | Tombacz et al. 2017                           | WES Study                       | AB11     |
| 25178164           | Sokolowski et al. 2015                        | Review Article                  | AB13BP   |
| 22059935           | Galfalvy et al. 2013                          | GWAS study not in Catalog       | ACCN1    |
| 29331709           | Bozorgmehr et al. 2018                        | Review Article                  | ACE      |
| 28769055           | Tombacz et al. 2017                           | WES Study                       | ACOT11   |
| 29331709; 28809398 | Bozorgmehr et al. 2018; Niculescu et al. 2017 | Review Article; Gene Expression | ACP1     |
| 28809398           | Niculescu et al. 2017                         | Gene Expression                 | ACSM3    |
| 25178164           | Sokolowski et al. 2015                        | Review Article                  | ACTB     |
| 25178164           | Sokolowski et al. 2015                        | Review Article                  | ACTN2    |
| 28809398           | Niculescu et al. 2017                         | Gene Expression                 | ADAL     |
| 28769055           | Tombacz et al. 2017                           | WES Study                       | ADAMDEC1 |
| 26079190           | Galfalvy et al. 2015                          | GWAS Catalog                    | ADAMTS14 |
| 25732952           | Karanovic et al. 2015                         | Candidate gene                  | ADARB1   |
| 25178164           | Sokolowski et al. 2015                        | Review Article                  | ADH1B    |
| 28809398           | Niculescu et al. 2017                         | Gene Expression                 | ADIRF    |
| 28809398           | Niculescu et al. 2017                         | Gene Expression                 | ADK      |
| 28809398           | Niculescu et al. 2017                         | Gene Expression                 | ADORA1   |
| 28769055           | Tombacz et al. 2017                           | WES Study                       | ADRA1A   |
| 27721799           | Mirkovic et al. 2016                          | Review Article                  | ADRA2A   |
| 25178164           | Sokolowski et al. 2015                        | Review Article                  | ADRA2B   |
| 25178164           | Sokolowski et al. 2015                        | Review Article                  | ADRB2    |
| 25178164           | Sokolowski et al. 2015                        | Review Article                  | ADRBK1   |
| 25178164           | Sokolowski et al. 2015                        | Review Article                  | ADRBK2   |
| 28769055           | Tombacz et al. 2017                           | WES Study                       | AFF2     |
| 28809398           | Niculescu et al. 2017                         | Gene Expression                 | AGA      |
| 25178164           | Sokolowski et al. 2015                        | Review Article                  | AGO1     |
| 28872639           | Flory et al. 2017                             | Gene Expression                 | AGO2     |
| 29331709           | Bozorgmehr et al. 2018                        | Review Article                  | AGT      |
| 28809398           | Niculescu et al. 2017                         | Gene Expression                 | AHCYL1   |
| 28809398           | Niculescu et al. 2017                         | Gene Expression                 | AHCYL2   |
| 28809398           | Niculescu et al. 2017                         | Gene Expression                 | AIMP1    |
| 28809398           | Niculescu et al. 2017                         | Gene Expression                 | AK2      |
| 28809398           | Niculescu et al. 2017                         | Gene Expression                 | AKAP10   |
| 28809398           | Niculescu et al. 2017                         | Gene Expression                 | AKAP13   |
| 28809398           | Niculescu et al. 2017                         | Gene Expression                 | AKAP2    |
| 27721799           | Mirkovic et al. 2016                          | Review Article                  | AKT1     |
| 28872639           | Flory et al. 2017                             | Gene Expression                 | AKT1S1   |
| 27721799           | Mirkovic et al. 2016                          | Review Article                  | AKTIP    |
| 25178164           | Sokolowski et al. 2015                        | Review Article                  | ALDH2    |
| 28809398           | Niculescu et al. 2017                         | Gene Expression                 | ALDH3A2  |
| 28809398           | Niculescu et al. 2017                         | Gene Expression                 | ALDH7A1  |
| 28769055           | Tombacz et al. 2017                           | WES Study                       | ALG13    |
| 21081163           | Fiori et al. 2012                             | Gene Expression                 | AMD1     |
| 25178164           | Sokolowski et al. 2015                        | Review Article                  | ANK3     |
| 28809398           | Niculescu et al. 2017                         | Gene Expression                 | ANKMY1   |
| 28769055           | Tombacz et al. 2017                           | WES Study                       | ANKRD2   |
| 23958961           | Le-Niculescu et al. 2013                      | Gene Expression                 | AP1S2    |
| 28769055           | Tombacz et al. 2017                           | WES Study                       | APLP2    |
| 25178164           | Sokolowski et al. 2015                        | Review Article                  | APOB     |
| 29331709; 28809398 | Bozorgmehr et al. 2018; Niculescu et al. 2017 | Review Article; Gene Expression | APOE     |
| 20877300           | Perroud et al. 2012                           | GWAS                            | APOO     |
| 23958961           | Le-Niculescu et al. 2013                      | Gene Expression                 | ARHGAP15 |
| 28809398           | Niculescu et al. 2017                         | Gene Expression                 | ARHGAP26 |
| 28769055           | Tombacz et al. 2017                           | WES Study                       | ARHGEF17 |
| 28809398           | Niculescu et al. 2017                         | Gene Expression                 | ARRB1    |
| 28769055           | Tombacz et al. 2017                           | WES Study                       | ARRDC2   |
| 28769055           | Tombacz et al. 2017                           | WES Study                       | ASB10    |
| 25178164           | Sokolowski et al. 2015                        | Review Article                  | ASIC2    |
| 28872639           | Flory et al. 2017                             | Gene Expression                 | ATF4     |
| 21041247           | Perlis et al. 2010                            | GWAS                            | ATL2     |
| 28769055           | Tombacz et al. 2017                           | WES Study                       | ATP11C   |
| 28809398           | Niculescu et al. 2017                         | Gene Expression                 | ATP13A2  |
| 28809398           | Niculescu et al. 2017                         | Gene Expression                 | ATP6V0E1 |
| 25178164           | Sokolowski et al. 2015                        | Review Article                  | AUTS2    |
| 25178164           | Sokolowski et al. 2015                        | Review Article                  | AVP      |
| 25178164           | Sokolowski et al. 2015                        | Review Article                  | AVPR1B   |
| 28809398           | Niculescu et al. 2017                         | Gene Expression                 | B2M      |

|                    |                                             |                               |           |
|--------------------|---------------------------------------------|-------------------------------|-----------|
| 21041247           | Perlis et al. 2010                          | GWAS Catalog                  | B3GALT5   |
| 28769055           | Tombacz et al. 2017                         | WES Study                     | BACE1     |
| 28809398           | Niculescu et al. 2017                       | Gene Expression               | BCKDHB    |
| 28809398           | Niculescu et al. 2017                       | Gene Expression               | BCL2      |
| 27721799           | Mirkovic et al. 2016                        | Review Article                | BDNF      |
| 28809398           | Niculescu et al. 2017                       | Gene Expression               | BF114768  |
| 28769055           | Tombacz et al. 2017                         | WES Study                     | BIK       |
| 28872639           | Flory et al. 2017                           | Gene Expression               | BMP6      |
| 28872639           | Flory et al. 2017                           | Gene Expression               | BMP7      |
| 28769055           | Tombacz et al. 2017                         | WES Study                     | BOD1L1    |
| 28872639           | Flory et al. 2017                           | Gene Expression               | BRAF      |
| 28809398           | Niculescu et al. 2017                       | Gene Expression               | BRCC3     |
| 26079190           | Galfalvy et al. 2015                        | GWAS Catalog                  | BRINP3    |
| 28769055           | Tombacz et al. 2017                         | WES Study                     | BRMS1L    |
| 28809398           | Niculescu et al. 2017                       | Gene Expression               | C14orf180 |
| 23958961           | Le-Niculescu et al. 2013                    | Gene Expression               | C18orf54  |
| 28769055           | Tombacz et al. 2017                         | WES Study                     | C1orf226  |
| 28769055           | Tombacz et al. 2017                         | WES Study                     | C1QTNF7   |
| 28809398           | Niculescu et al. 2017                       | Gene Expression               | C20orf27  |
| 28769055           | Tombacz et al. 2017                         | WES Study                     | C6        |
| 28809398           | Niculescu et al. 2017                       | Gene Expression               | C7orf73   |
| 26079190; 28809398 | Galfalvy et al. 2015; Niculescu et al. 2017 | GWAS Catalog; Gene Expression | C8orf74   |
| 25178164           | Sokolowski et al. 2015                      | Review Article                | CACNA1C   |
| 28769055           | Tombacz et al. 2017                         | WES Study                     | CACNA2D4  |
| 28809398           | Niculescu et al. 2017                       | Gene Expression               | CALR      |
| 28769055           | Tombacz et al. 2017                         | WES Study                     | CAND2     |
| 21041247           | Perlis et al. 2010                          | GWAS                          | CAPN13    |
| 28809398           | Niculescu et al. 2017                       | Gene Expression               | CAT       |
| 25178164           | Sokolowski et al. 2015                      | Review Article                | CBR1      |
| 25917933           | Zai et al. 2015                             | GWAS Catalog                  | CCDC7     |
| 28769055           | Tombacz et al. 2017                         | WES Study                     | CCDC93    |
| 29331709           | Bozorgmehr et al. 2018                      | Review Article                | CCK       |
| 27721799           | Mirkovic et al. 2016                        | Review Article                | CCKBR     |
| 28872639           | Flory et al. 2017                           | Gene Expression               | CCND1     |
| 28809398           | Niculescu et al. 2017                       | Gene Expression               | CD109     |
| 28809398           | Niculescu et al. 2017                       | Gene Expression               | CD164     |
| 23958961           | Le-Niculescu et al. 2013                    | Gene Expression               | CD200R1   |
| 22058935           | Galfalvy et al. 2013                        | GWAS study not in Catalog     | CD300LB   |
| 22058935           | Galfalvy et al. 2013                        | GWAS study not in Catalog     | CD44      |
| 28809398           | Niculescu et al. 2017                       | Gene Expression               | CD47      |
| 23958961           | Le-Niculescu et al. 2013                    | Gene Expression               | CD84      |
| 28769055           | Tombacz et al. 2017                         | WES Study                     | CDC34     |
| 28809398           | Niculescu et al. 2017                       | Gene Expression               | CDC42EP4  |
| 25178164           | Sokolowski et al. 2015                      | Review Article                | CDC47L    |
| 25178164           | Sokolowski et al. 2015                      | Review Article                | CDH10     |
| 25178164           | Sokolowski et al. 2015                      | Review Article                | CDH12     |
| 22058935           | Galfalvy et al. 2013                        | GWAS study not in Catalog     | CDH13     |
| 28872639           | Flory et al. 2017                           | Gene Expression               | CDH2      |
| 25178164           | Sokolowski et al. 2015                      | Review Article                | CDH9      |
| 28769055           | Tombacz et al. 2017                         | WES Study                     | CDK14     |
| 28809398           | Niculescu et al. 2017                       | Gene Expression               | CDKAL1    |
| 28769055           | Tombacz et al. 2017                         | WES Study                     | CELSR3    |
| 28769055           | Tombacz et al. 2017                         | WES Study                     | CENPC     |
| 28809398           | Niculescu et al. 2017                       | Gene Expression               | CENPH     |
| 23958961           | Le-Niculescu et al. 2013                    | Gene Expression               | CEP44     |
| 28769055           | Tombacz et al. 2017                         | WES Study                     | CEP72     |
| 28769055           | Tombacz et al. 2017                         | WES Study                     | CEP85L    |
| 28769055           | Tombacz et al. 2017                         | WES Study                     | CES4A     |
| 28769055           | Tombacz et al. 2017                         | WES Study                     | CFAP57    |
| 28769055           | Tombacz et al. 2017                         | WES Study                     | CFAP70    |
| 25178164           | Sokolowski et al. 2015                      | Review Article                | CKB       |
| 28809398           | Niculescu et al. 2017                       | Gene Expression               | CLN5      |
| 28809398           | Niculescu et al. 2017                       | Gene Expression               | CLTA      |
| 28809398           | Niculescu et al. 2017                       | Gene Expression               | CNOT3     |
| 21081163           | Fiori et al. 2012                           | Gene Expression               | CNP       |
| 25178164           | Sokolowski et al. 2015                      | Review Article                | CNR1      |
| 28769055           | Tombacz et al. 2017                         | WES Study                     | COL12A1   |
| 22058935           | Galfalvy et al. 2013                        | GWAS study not in Catalog     | COL14A1   |
| 28769055           | Tombacz et al. 2017                         | WES Study                     | COL6A6    |
| 27721799           | Mirkovic et al. 2016                        | Review Article                | COMT      |
| 28769055           | Tombacz et al. 2017                         | WES Study                     | CPEB2     |
| 28809398           | Niculescu et al. 2017                       | Gene Expression               | CRAYAB    |

|                    |                                               |                                 |                 |
|--------------------|-----------------------------------------------|---------------------------------|-----------------|
| 29331709           | Bozorgmehr et al. 2018                        | Review Article                  | CREB1           |
| 29331709           | Bozorgmehr et al. 2018                        | Review Article                  | CRH             |
| 27721799           | Mirkovic et al. 2016                          | Review Article                  | CRHBP           |
| 27721799           | Mirkovic et al. 2016                          | Review Article                  | CRHR            |
| 27721799           | Mirkovic et al. 2016                          | Review Article                  | CRHR1           |
| 27721799           | Mirkovic et al. 2016                          | Review Article                  | CRHR2           |
| 23958961           | Le-Niculescu et al. 2013                      | Gene Expression                 | CROT            |
| 25178164           | Sokolowski et al. 2015                        | Review Article                  | CRP             |
| 28872639           | Flory et al. 2017                             | Gene Expression                 | CSNK1G2         |
| 28872639           | Flory et al. 2017                             | Gene Expression                 | CTGF            |
| 22030708           | Menke et al. 2012                             | GWAS study not in Catalog       | CTNNA3          |
| 28872639           | Flory et al. 2017                             | Gene Expression                 | CTNNA3          |
| 25178164           | Sokolowski et al. 2015                        | Review Article                  | CTNNA3          |
| 28809398           | Niculescu et al. 2017                         | Gene Expression                 | CTNNA3          |
| 28769055           | Tombacz et al. 2017                           | WES Study                       | CTSD            |
| 28769055           | Tombacz et al. 2017                           | WES Study                       | CTTN            |
| 28769055           | Tombacz et al. 2017                           | WES Study                       | CTTNBP2         |
| 28872639           | Flory et al. 2017                             | Gene Expression                 | CWC27           |
| 22058935           | Galfalvy et al. 2013                          | GWAS study not in Catalog       | CXorf23         |
| 29331709           | Bozorgmehr et al. 2018                        | Review Article                  | CXXC4           |
| 29331709           | Bozorgmehr et al. 2018                        | Review Article                  | CYP19A1         |
| 28769055           | Tombacz et al. 2017                           | WES Study                       | CYP2C19         |
| 28809398           | Niculescu et al. 2017                         | Gene Expression                 | CYP2D6          |
| 25178164           | Sokolowski et al. 2015                        | Review Article                  | D2HGDH          |
| 25178164           | Sokolowski et al. 2015                        | Review Article                  | DAB2            |
| 23958961           | Le-Niculescu et al. 2013                      | Gene Expression                 | DBH             |
| 28769055           | Tombacz et al. 2017                           | WES Study                       | DBI             |
| 29331709           | Bozorgmehr et al. 2018                        | Review Article                  | DCAF5           |
| 28769055           | Tombacz et al. 2017                           | WES Study                       | DCC             |
| 25178164           | Sokolowski et al. 2015                        | Review Article                  | DDC             |
| 28769055           | Tombacz et al. 2017                           | WES Study                       | DEDD2           |
| 25178164           | Sokolowski et al. 2015                        | Review Article                  | DGCR8           |
| 28769055           | Tombacz et al. 2017                           | WES Study                       | DGKA            |
| 25178164           | Sokolowski et al. 2015                        | Review Article                  | DHCR7           |
| 22058935           | Galfalvy et al. 2013                          | GWAS study not in Catalog       | DISC1           |
| 28809398           | Niculescu et al. 2017                         | Gene Expression                 | DLG1            |
| 28769055           | Tombacz et al. 2017                           | WES Study                       | DLG2            |
| 25178164           | Sokolowski et al. 2015                        | Review Article                  | DLK1            |
| 25178164           | Sokolowski et al. 2015                        | Review Article                  | DLK2            |
| 28809398; 25178164 | Niculescu et al. 2017; Sokolowski et al. 2015 | Gene Expression; Review Article | DLL1            |
| 25178164           | Sokolowski et al. 2015                        | Review Article                  | DLL4            |
| 28769055           | Tombacz et al. 2017                           | WES Study                       | DMD             |
| 28769055           | Tombacz et al. 2017                           | WES Study                       | DNAH5           |
| 25178164           | Sokolowski et al. 2015                        | Review Article                  | DNMT3B          |
| 28769055           | Tombacz et al. 2017                           | WES Study                       | DOT1L           |
| 26079190           | Galfalvy et al. 2015                          | GWAS Catalog                    | DPP10           |
| 25178164           | Sokolowski et al. 2015                        | Review Article                  | DPYSL2          |
| 27721799           | Mirkovic et al. 2016                          | Review Article                  | DRD2            |
| 29331709           | Bozorgmehr et al. 2018                        | Review Article                  | DRD4            |
| 22058935           | Galfalvy et al. 2013                          | GWAS study not in Catalog       | DSC2            |
| 28809398           | Niculescu et al. 2017                         | Gene Expression                 | DSPP            |
| 23958961           | Le-Niculescu et al. 2013                      | Gene Expression                 | DTWD2           |
| 28809398           | Niculescu et al. 2017                         | Gene Expression                 | DUSP13          |
| 28872639           | Flory et al. 2017                             | Gene Expression                 | DVL1            |
| 28809398           | Niculescu et al. 2017                         | Gene Expression                 | DYRK2           |
| 28769055           | Tombacz et al. 2017                           | WES Study                       | EBF4            |
| 28809398           | Niculescu et al. 2017                         | Gene Expression                 | ECHDC1          |
| 25178164           | Sokolowski et al. 2015                        | Review Article                  | EFEMP1          |
| 28809398           | Niculescu et al. 2017                         | Gene Expression                 | EFEMP2          |
| 25178164           | Sokolowski et al. 2015                        | Review Article                  | EFHD2           |
| 28872639           | Flory et al. 2017                             | Gene Expression                 | EIF1AX          |
| 28872639           | Flory et al. 2017                             | Gene Expression                 | EIF2B1          |
| 28872639           | Flory et al. 2017                             | Gene Expression                 | EIF3E           |
| 28872639           | Flory et al. 2017                             | Gene Expression                 | EIF3F           |
| 28872639           | Flory et al. 2017                             | Gene Expression                 | EIF3H           |
| 28872639           | Flory et al. 2017                             | Gene Expression                 | EIF4G2          |
| 28769055           | Tombacz et al. 2017                           | WES Study                       | ENST00000358775 |
| 28769055           | Tombacz et al. 2017                           | WES Study                       | ENST00000376267 |
| 28769055           | Tombacz et al. 2017                           | WES Study                       | ENST00000424383 |
| 28769055           | Tombacz et al. 2017                           | WES Study                       | ENST00000520137 |
| 26079190           | Galfalvy et al. 2015                          | GWAS Catalog                    | EPB41L4A        |
| 23958961           | Le-Niculescu et al. 2013                      | Gene Expression                 | EPB41L5         |
| 28769055           | Tombacz et al. 2017                           | WES Study                       | EPHA1           |
| 28769055           | Tombacz et al. 2017                           | WES Study                       | EPS15           |

|                    |                                               |                                 |              |
|--------------------|-----------------------------------------------|---------------------------------|--------------|
| 28769055           | Tombacz et al. 2017                           | WES Study                       | ERC5         |
| 23958961           | Le-Niculescu et al. 2013                      | Gene Expression                 | ERP27        |
| 25178164           | Sokolowski et al. 2015                        | Review Article                  | ESR1         |
| 25178164           | Sokolowski et al. 2015                        | Review Article                  | ESR2         |
| 25178164           | Sokolowski et al. 2015                        | Review Article                  | EVC          |
| 28769055           | Tombacz et al. 2017                           | WES Study                       | EVPL         |
| 28809398           | Niculescu et al. 2017                         | Gene Expression                 | EZR          |
| 25178164           | Sokolowski et al. 2015                        | Review Article                  | FAAH         |
| 27721799           | Mirkovic et al. 2016                          | Review Article                  | FABP5        |
| 28809398; 25178164 | Niculescu et al. 2017; Sokolowski et al. 2015 | Gene Expression; Review Article | FADS1        |
|                    |                                               |                                 | FAM110C -    |
|                    |                                               |                                 | LOC105373324 |
| 21423239           | Willour et al. 2012                           | GWAS Catalog                    | FAM173B      |
| 23958961           | Le-Niculescu et al. 2013                      | Gene Expression                 | FAM175A      |
| 28769055           | Tombacz et al. 2017                           | WES Study                       | FAM63B       |
| 28809398           | Niculescu et al. 2017                         | Gene Expression                 | FBXL18       |
| 22030708           | Menke et al. 2012                             | GWAS                            | FFAR4        |
| 28769055           | Tombacz et al. 2017                           | WES Study                       | FGFR2        |
| 21081163           | Fiori et al. 2012                             | Gene Expression                 | FGFR3        |
| 21081163           | Fiori et al. 2012                             | Gene Expression                 | FH           |
| 28809398           | Niculescu et al. 2017                         | Gene Expression                 | FIGNL1       |
| 28809398           | Niculescu et al. 2017                         | Gene Expression                 | FKBP4        |
| 25178164           | Sokolowski et al. 2015                        | Review Article                  | FKBP5        |
| 27721799           | Mirkovic et al. 2016                          | Review Article                  | FLJ23312     |
| 22058935           | Galfalvy et al. 2013                          | GWAS study not in Catalog       | FLJ45079     |
| 28769055           | Tombacz et al. 2017                           | WES Study                       | FLOT2        |
| 28809398           | Niculescu et al. 2017                         | Gene Expression                 | FOXD4        |
| 25178164           | Sokolowski et al. 2015                        | Review Article                  | FOXP1        |
| 22058935           | Galfalvy et al. 2013                          | GWAS study not in Catalog       | FSD1L        |
| 23958961           | Le-Niculescu et al. 2013                      | Gene Expression                 | FZD5         |
| 28769055           | Tombacz et al. 2017                           | WES Study                       | FZD9         |
| 28872639           | Flory et al. 2017                             | Gene Expression                 | G2E3         |
| 28872639           | Flory et al. 2017                             | Gene Expression                 | GABARAPL1    |
| 28809398           | Niculescu et al. 2017                         | Gene Expression                 | GABRA1       |
| 21081163           | Fiori et al. 2012                             | Gene Expression                 | GABRA2       |
| 25178164           | Sokolowski et al. 2015                        | Review Article                  | GABRA4       |
| 25178164           | Sokolowski et al. 2015                        | Review Article                  | GABRA5       |
| 21081163           | Fiori et al. 2012                             | Gene Expression                 | GABRB3       |
| 21081163           | Fiori et al. 2012                             | Gene Expression                 | GABRD        |
| 21081163           | Fiori et al. 2012                             | Gene Expression                 | GABRG1       |
| 25178164           | Sokolowski et al. 2015                        | Review Article                  | GABRG2       |
| 29331709           | Bozorgmehr et al. 2018                        | Review Article                  | GABRG3       |
| 25178164           | Sokolowski et al. 2015                        | Review Article                  | GABRP        |
| 25178164           | Sokolowski et al. 2015                        | Review Article                  | GABRR1       |
| 21081163           | Fiori et al. 2012                             | Gene Expression                 | GAD1         |
| 29331709           | Bozorgmehr et al. 2018                        | Review Article                  | GANC         |
| 23958961           | Le-Niculescu et al. 2013                      | Gene Expression                 | GAS1         |
| 28872639           | Flory et al. 2017                             | Gene Expression                 | GAS6         |
| 28872639           | Flory et al. 2017                             | Gene Expression                 | GATM         |
| 28809398           | Niculescu et al. 2017                         | Gene Expression                 | GDA          |
| 20877300           | Perroud et al. 2012                           | GWAS Catalog                    | GDJ2         |
| 28809398           | Niculescu et al. 2017                         | Gene Expression                 | GFAP         |
| 25178164           | Sokolowski et al. 2015                        | Review Article                  | GFRA1        |
| 21750702           | Schosser et al. 2011                          | GWAS study not in Catalog       | GJA1         |
| 21081163           | Fiori et al. 2012                             | Gene Expression                 | GLS          |
| 21081163           | Fiori et al. 2012                             | Gene Expression                 | GLUD1        |
| 21081163           | Fiori et al. 2012                             | Gene Expression                 | GLUL         |
| 25178164           | Sokolowski et al. 2015                        | Review Article                  | GMEB2        |
| 28769055           | Tombacz et al. 2017                           | WES Study                       | GNA12        |
| 28872639           | Flory et al. 2017                             | Gene Expression                 | GNAI1        |
| 25178164           | Sokolowski et al. 2015                        | Review Article                  | GNAI2        |
| 25178164           | Sokolowski et al. 2015                        | Review Article                  | GNAL         |
| 28769055           | Tombacz et al. 2017                           | WES Study                       | GNAZ         |
| 28872639           | Flory et al. 2017                             | Gene Expression                 | GNGB         |
| 28872639           | Flory et al. 2017                             | Gene Expression                 | GPM6B        |
| 21081163           | Fiori et al. 2012                             | Gene Expression                 | GR1A3        |
| 27721799           | Mirkovic et al. 2016                          | Review Article                  | GRABRB1      |
| 21081163           | Fiori et al. 2012                             | Gene Expression                 | GRABRB3      |
| 21081163           | Fiori et al. 2012                             | Gene Expression                 | GRIA1        |
| 25178164           | Sokolowski et al. 2015                        | Review Article                  | GRIA2        |
| 21081163           | Fiori et al. 2012                             | Gene Expression                 | GRIA3        |
| 25178164           | Sokolowski et al. 2015                        | Review Article                  |              |

|                    |                                               |                                  |           |
|--------------------|-----------------------------------------------|----------------------------------|-----------|
| 21081163           | Fiori et al. 2012                             | Gene Expression                  | GRIA4     |
| 21081163           | Fiori et al. 2012                             | Gene Expression                  | GRIK1     |
| 27721799           | Mirkovic et al. 2016                          | Review Article                   | GRIK2     |
| 25178164           | Sokolowski et al. 2015                        | Review Article                   | GRIN2A    |
| 27721799           | Mirkovic et al. 2016                          | Review Article                   | GRIN2B    |
| 21081163           | Fiori et al. 2012                             | Gene Expression                  | GRINA     |
| 21081163           | Fiori et al. 2012                             | Gene Expression                  | GRINL1A   |
| 24964207           | Mullins et al. 2014                           | GWAS Catalog                     | GRIP1     |
| 21081163           | Fiori et al. 2012                             | Gene Expression                  | GRM3      |
| 29331709; 28809398 | Bozorgmehr et al. 2018; Niculescu et al. 2017 | Review Article; Gene Expression  | GSK3B     |
| 23958961           | Le-Niculescu et al. 2013                      | Gene Expression                  | GTF3C2    |
| 28769055           | Tombacz et al. 2017                           | WES Study                        | GXYLT1    |
| 28769055           | Tombacz et al. 2017                           | WES Study                        | H2AFZ     |
| 28769055           | Tombacz et al. 2017                           | WES Study                        | HAPLN1    |
| 23958961           | Le-Niculescu et al. 2013                      | Gene Expression                  | HAVCR2    |
| 28872639           | Flory et al. 2017                             | Gene Expression                  | HDGF      |
| 25178164           | Sokolowski et al. 2015                        | Review Article                   | HES1      |
| 28769055           | Tombacz et al. 2017                           | WES Study                        | HIPK2     |
| 28809398           | Niculescu et al. 2017                         | Gene Expression                  | HIST1H2BO |
| 27721799           | Mirkovic et al. 2016                          | Review Article                   | HOMER1    |
| 28769055           | Tombacz et al. 2017                           | WES Study                        | HR        |
| 25178164           | Sokolowski et al. 2015                        | Review Article                   | HSPA8     |
| 27721799           | Mirkovic et al. 2016                          | Review Article                   | HTR1A     |
| 27721799           | Mirkovic et al. 2016                          | Review Article                   | HTR1B     |
| 25178164           | Sokolowski et al. 2015                        | Review Article                   | HTR1E     |
| 27721799           | Mirkovic et al. 2016                          | Review Article                   | HTR2A     |
| 25178164           | Sokolowski et al. 2015                        | Review Article                   | HTR2B     |
| 29331709           | Bozorgmehr et al. 2018                        | Review Article                   | HTR2C     |
| 25178164           | Sokolowski et al. 2015                        | Review Article                   | HTR4      |
| 25178164           | Sokolowski et al. 2015                        | Review Article                   | HTR6      |
| 23958961           | Le-Niculescu et al. 2013                      | Gene Expression                  | HTRA1     |
| 28809398           | Niculescu et al. 2017                         | Gene Expression                  | ICAM4     |
| 25178164           | Sokolowski et al. 2015                        | Review Article                   | IFNG      |
| 28872639           | Flory et al. 2017                             | Gene Expression                  | IGF2      |
| 28809398           | Niculescu et al. 2017                         | Gene Expression                  | IGHG1     |
| 25178164           | Sokolowski et al. 2015                        | Review Article                   | IL10      |
| 28872639; 28809398 | Flory et al. 2017; Niculescu et al. 2017      | Gene Expression; Gene Expression | IL13      |
| 23958961           | Le-Niculescu et al. 2013                      | Gene Expression                  | IL1R1     |
| 25178164           | Sokolowski et al. 2015                        | Review Article                   | IL2       |
| 28872639           | Flory et al. 2017                             | Gene Expression                  | IL23A     |
| 19724245           | Laje et al. 2009                              | GWAS study not in Catalog        | IL28RA    |
| 28809398; 25178164 | Niculescu et al. 2017; Sokolowski et al. 2015 | Gene Expression; Review Article  | IL6       |
| 25178164           | Sokolowski et al. 2015                        | Review Article                   | IL8       |
| 29331709           | Bozorgmehr et al. 2018                        | Review Article                   | IMPA2     |
| 25178164           | Sokolowski et al. 2015                        | Review Article                   | INA       |
| 28769055           | Tombacz et al. 2017                           | WES Study                        | ING5      |
| 29331709           | Bozorgmehr et al. 2018                        | Review Article                   | ING-G     |
| 23958961           | Le-Niculescu et al. 2013                      | Gene Expression                  | INO80D    |
| 29331709           | Bozorgmehr et al. 2018                        | Review Article                   | INPP1     |
| 23958961           | Le-Niculescu et al. 2013                      | Gene Expression                  | INPP4A    |
| 28872639           | Flory et al. 2017                             | Gene Expression                  | ITGA8     |
| 28809398           | Niculescu et al. 2017                         | Gene Expression                  | ITGB1BP1  |
| 28872639           | Flory et al. 2017                             | Gene Expression                  | ITGB3     |
| 28872639           | Flory et al. 2017                             | Gene Expression                  | ITGB5     |
| 23958961           | Le-Niculescu et al. 2013                      | Gene Expression                  | ITLN1     |
| 28809398           | Niculescu et al. 2017                         | Gene Expression                  | ITPKB     |
| 25178164           | Sokolowski et al. 2015                        | Review Article                   | JAG1      |
| 25178164           | Sokolowski et al. 2015                        | Review Article                   | JAG2      |
| 28809398           | Niculescu et al. 2017                         | Gene Expression                  | JMJD1C    |
| 23958961           | Le-Niculescu et al. 2013                      | Gene Expression                  | JRK       |
| 23958961           | Le-Niculescu et al. 2013                      | Gene Expression                  | JUN       |
| 22059935           | Galfalvy et al. 2013                          | GWAS study not in Catalog        | KBTBD2    |
| 28809398           | Niculescu et al. 2017                         | Gene Expression                  | KBTBD2    |
| 28769055           | Tombacz et al. 2017                           | WES Study                        | KCNB1     |
| 20877300           | Perroud et al. 2012                           | GWAS Catalog                     | KCNIP4    |
| 23958961           | Le-Niculescu et al. 2013                      | Gene Expression                  | KCTD5     |
| 28769055           | Tombacz et al. 2017                           | WES Study                        | KIAA1147  |
| 21750702           | Schosser et al. 2011                          | GWAS study not in Catalog        | KIAA1244  |
| 28769055           | Tombacz et al. 2017                           | WES Study                        | KIAA1429  |
| 28769055           | Tombacz et al. 2017                           | WES Study                        | KIAA1462  |
| 28769055           | Tombacz et al. 2017                           | WES Study                        | KIAA1549  |
| 21423239           | Willour et al. 2012                           | GWAS Catalog                     | KIAA1549L |

|                    |                                               |                                  |                |
|--------------------|-----------------------------------------------|----------------------------------|----------------|
| 28769055           | Tombacz et al. 2017                           | WES Study                        | KIAA1875       |
| 23958961           | Le-Niculescu et al. 2013                      | Gene Expression                  | KIR2DL4        |
| 28769055           | Tombacz et al. 2017                           | WES Study                        | KLF7           |
| 28809398           | Niculescu et al. 2017                         | Gene Expression                  | KLK7           |
| 28769055           | Tombacz et al. 2017                           | WES Study                        | KRT77          |
| 28769055           | Tombacz et al. 2017                           | WES Study                        | KRTAP2-4       |
| 28769055           | Tombacz et al. 2017                           | WES Study                        | LAMA3          |
| 28809398           | Niculescu et al. 2017                         | Gene Expression                  | LDLRAP1        |
| 28872639           | Flory et al. 2017                             | Gene Expression                  | LEFTY2         |
| 28809398; 25178164 | Niculescu et al. 2017; Sokolowski et al. 2015 | Gene Expression; Review Article  | LEPR           |
| 28809398           | Niculescu et al. 2017                         | Gene Expression                  | LHFP           |
| 23958961           | Le-Niculescu et al. 2013                      | Gene Expression                  | LINC00342      |
| 28769055           | Tombacz et al. 2017                           | WES Study                        | LINC00632      |
| 25178164           | Sokolowski et al. 2015                        | Review Article                   | LIPA           |
| 28769055           | Tombacz et al. 2017                           | WES Study                        | LOC100507443   |
|                    |                                               |                                  | LOC101928174 - |
|                    |                                               |                                  | LOC100132824   |
|                    |                                               |                                  | LOC105372912   |
|                    |                                               |                                  | LOC105376477   |
|                    |                                               |                                  | LOC107986892   |
| 26079190           | Galfalvy et al. 2015                          | GWAS Catalog                     | LPAR1          |
| 26079190           | Galfalvy et al. 2015                          | GWAS Catalog                     | LRP5           |
| 21041247           | Perlis et al. 2010                            | GWAS Catalog                     | LRP6           |
| 25917933           | Zai et al. 2015                               | GWAS Catalog                     | LRRC37A4P      |
| 28809398           | Niculescu et al. 2017                         | Gene Expression                  | LRRC74A        |
| 28872639           | Flory et al. 2017                             | Gene Expression                  | LRRN3          |
| 28872639           | Flory et al. 2017                             | Gene Expression                  | LRRTM4         |
| 28769055           | Tombacz et al. 2017                           | WES Study                        | LSAMP          |
| 28769055           | Tombacz et al. 2017                           | WES Study                        | MACROD2        |
| 28809398           | Niculescu et al. 2017                         | Gene Expression                  | MAML1          |
| 25178164           | Sokolowski et al. 2015                        | Review Article                   | MAN1B1         |
| 22058935           | Galfalvy et al. 2013                          | GWAS study not in Catalog        | MAOA           |
| 25178164           | Sokolowski et al. 2015                        | Review Article                   | MAOB           |
| 28769055           | Tombacz et al. 2017                           | WES Study                        | MAP2K2         |
| 28769055           | Tombacz et al. 2017                           | WES Study                        | MAP2K5         |
| 27721799           | Mirkovic et al. 2016                          | Review Article                   | MAP3K14-AS1    |
| 25178164           | Sokolowski et al. 2015                        | Review Article                   | MAP3K15        |
| 28872639           | Flory et al. 2017                             | Gene Expression                  | MAP3K3         |
| 28809398           | Niculescu et al. 2017                         | Gene Expression                  | MAP3K7         |
| 28769055           | Tombacz et al. 2017                           | WES Study                        | MAPK2          |
| 28872639           | Flory et al. 2017                             | Gene Expression                  | MAPK3          |
| 28872639           | Flory et al. 2017                             | Gene Expression                  | MARCH1         |
| 22058935; 28769055 | Galfalvy et al. 2013; Tombacz et al. 2017     | GWAS, WES                        | MARCKS         |
| 25178164           | Sokolowski et al. 2015                        | Review Article                   | MBNL2          |
| 22058935           | Galfalvy et al. 2013                          | GWAS study not in Catalog        | MBP            |
| 21081163; 28809398 | Fiori et al. 2012; Niculescu et al. 2017      | Gene Expression; Gene Expression | MCAM           |
| 28769055           | Tombacz et al. 2017                           | WES Study                        | MCCD1          |
| 28769055           | Tombacz et al. 2017                           | WES Study                        | MDN1           |
| 28769055           | Tombacz et al. 2017                           | WES Study                        | MED28          |
| 28809398           | Niculescu et al. 2017                         | Gene Expression                  | METTL15        |
| 23958961           | Le-Niculescu et al. 2013                      | Gene Expression                  | MIA3           |
| 28769055           | Tombacz et al. 2017                           | WES Study                        | MIR548AA1      |
| 26666204           | Sokolowski et al. 2016                        | GWAS                             | MIR548D1       |
| 26666204           | Sokolowski et al. 2016                        | GWAS                             | MIXL1          |
| 28769055           | Tombacz et al. 2017                           | WES Study                        | MLC1           |
| 25178164           | Sokolowski et al. 2015                        | Review Article                   | MMP7           |
| 28872639           | Flory et al. 2017                             | Gene Expression                  | MNX1           |
| 28769055           | Tombacz et al. 2017                           | WES Study                        | MOB3B          |
| 23958961           | Le-Niculescu et al. 2013                      | Gene Expression                  | MOG            |
| 21081163           | Fiori et al. 2012                             | Gene Expression                  | MPDZ           |
| 28769055           | Tombacz et al. 2017                           | WES Study                        | MRAP2          |
| 28769055           | Tombacz et al. 2017                           | WES Study                        | MRPL45         |
| 28769055           | Tombacz et al. 2017                           | WES Study                        | MRPS14         |
| 28809398           | Niculescu et al. 2017                         | Gene Expression                  | MRT04          |
| 28809398           | Niculescu et al. 2017                         | Gene Expression                  | MT1E           |
| 28809398           | Niculescu et al. 2017                         | Gene Expression                  | MTERF4         |
| 25178164           | Sokolowski et al. 2015                        | Review Article                   | MTHFR          |
| 25917933           | Zai et al. 2015                               | GWAS Catalog                     | MTL3P          |
| 28769055           | Tombacz et al. 2017                           | WES Study                        | MYBPC1         |
| 28872639           | Flory et al. 2017                             | Gene Expression                  | MYC            |
| 22058935           | Galfalvy et al. 2013                          | GWAS study not in Catalog        | MYO3A          |
| 28809398           | Niculescu et al. 2017                         | Gene Expression                  | N4BP2L2        |



|                    |                                                |                                  |           |
|--------------------|------------------------------------------------|----------------------------------|-----------|
| 21081163           | Fiori et al. 2012                              | Gene Expression                  | NAPA      |
| 28769055           | Tombacz et al. 2017                            | WES Study                        | NAV2      |
| 28769055           | Tombacz et al. 2017                            | WES Study                        | NBEAP1    |
| 24964207           | Mullins et al. 2014                            | GWAS Catalog                     | NCAM1     |
| 23958961           | Le-Niculescu et al. 2013                       | Gene Expression                  | NDRG1     |
| 28809398           | Niculescu et al. 2017                          | Gene Expression                  | NDUFS1    |
| 28809398           | Niculescu et al. 2017                          | Gene Expression                  | NEAT1     |
| 21750702           | Schosser et al. 2011                           | GWAS                             | NEBL      |
| 25178164           | Sokolowski et al. 2015                         | Review Article                   | NEFL      |
| 25178164           | Sokolowski et al. 2015                         | Review Article                   | NEFM      |
| 28809398           | Niculescu et al. 2017                          | Gene Expression                  | NEK9      |
| 25178164           | Sokolowski et al. 2015                         | Review Article                   | NGF       |
| 29331709; 28809398 | Bozorgmehr et al. 2018; Niculescu et al. 2017  | Review Article; Gene Expression  | NGFR      |
| 28769055           | Tombacz et al. 2017                            | WES Study                        | NHS       |
| 28769055           | Tombacz et al. 2017                            | WES Study                        | NID2      |
| 28769055           | Tombacz et al. 2017                            | WES Study                        | NINJ1     |
| 28769055           | Tombacz et al. 2017                            | WES Study                        | NME1      |
| 29331709           | Bozorgmehr et al. 2018                         | Review Article                   | NOS1      |
| 29331709           | Bozorgmehr et al. 2018                         | Review Article                   | NOS3      |
| 25178164           | Sokolowski et al. 2015                         | Review Article                   | NOTCH1    |
| 25178164           | Sokolowski et al. 2015                         | Review Article                   | NOTCH2    |
| 25178164           | Sokolowski et al. 2015                         | Review Article                   | NOTCH3    |
| 29331709           | Bozorgmehr et al. 2018                         | Review Article                   | NOTCH4    |
| 22058935           | Galfalvy et al. 2013                           | GWAS study not in Catalog        | NPR3      |
| 25178164           | Sokolowski et al. 2015                         | Review Article                   | NPR351    |
| 28769055           | Tombacz et al. 2017                            | WES Study                        | NPSR1-AS1 |
| 27721799           | Mirkovic et al. 2016                           | Review Article                   | NPTX2     |
| 29331709           | Bozorgmehr et al. 2018                         | Review Article                   | NPY       |
| 25178164           | Sokolowski et al. 2015                         | Review Article                   | NPY2R     |
| 28769055           | Tombacz et al. 2017                            | WES Study                        | NR0B1     |
| 27721799           | Mirkovic et al. 2016                           | Review Article                   | NR3C1     |
| 28769055           | Tombacz et al. 2017                            | WES Study                        | NREP      |
| 28769055           | Tombacz et al. 2017                            | WES Study                        | NSD1      |
| 25178164           | Sokolowski et al. 2015                         | Review Article                   | NTF3      |
| 25178164           | Sokolowski et al. 2015                         | Review Article                   | NTF4      |
| 27721799           | Mirkovic et al. 2016                           | Review Article                   | NTKR2     |
| 25178164           | Sokolowski et al. 2015                         | Review Article                   | NTRK2     |
| 28809398           | Niculescu et al. 2017                          | Gene Expression                  | NUB1      |
| 28769055           | Tombacz et al. 2017                            | WES Study                        | NUDCD3    |
| 23958961           | Le-Niculescu et al. 2013                       | Gene Expression                  | NUDT10    |
| 20877300           | Perroud et al. 2012                            | GWAS Catalog                     | NUGGC     |
| 27721799           | Mirkovic et al. 2016                           | Review Article                   | ODC1      |
| 21081163; 28809398 | Fiori et al. 2012; Niculescu et al. 2017       | Gene Expression                  | OLIG1     |
| 28769055           | Tombacz et al. 2017                            | WES Study                        | OPHN1     |
| 29331709; 25178164 | Bozorgmehr et al. 2018; Sokolowski et al. 2015 | Review Article; Review Article   | OPRM1     |
| 28769055           | Tombacz et al. 2017                            | WES Study                        | OTOG      |
| 28769055           | Tombacz et al. 2017                            | WES Study                        | OTOGL     |
| 25178164           | Sokolowski et al. 2015                         | Review Article                   | OXT       |
| 28809398           | Niculescu et al. 2017                          | Gene Expression                  | PAFAH1B2  |
| 25178164           | Sokolowski et al. 2015                         | Review Article                   | PAH       |
| 19724244           | Laje et al. 2009                               | GWAS study not in Catalog        | PAPLN     |
| 28769055           | Tombacz et al. 2017                            | WES Study                        | PARD3B    |
| 28769055           | Tombacz et al. 2017                            | WES Study                        | PBDC1     |
| 28809398           | Niculescu et al. 2017                          | Gene Expression                  | PCDH9     |
| 28769055           | Tombacz et al. 2017                            | WES Study                        | PCDH2A    |
| 25178164           | Sokolowski et al. 2015                         | Review Article                   | PCDHB5    |
| 28769055           | Tombacz et al. 2017                            | WES Study                        | PCDHB7    |
| 28769055           | Tombacz et al. 2017                            | WES Study                        | PCSK5     |
| 28769055           | Tombacz et al. 2017                            | WES Study                        | PCYOX1L   |
| 28872639           | Flory et al. 2017                              | Gene Expression                  | PDGFA     |
| 23958961           | Le-Niculescu et al. 2013                       | Gene Expression                  | PDXDC1    |
| 28769055           | Tombacz et al. 2017                            | WES Study                        | PMT       |
| 23958961           | Le-Niculescu et al. 2013                       | Gene Expression                  | PER1      |
| 28769055           | Tombacz et al. 2017                            | WES Study                        | PER2      |
| 25178164           | Sokolowski et al. 2015                         | Review Article                   | PGAM1     |
| 28809398           | Niculescu et al. 2017                          | Gene Expression                  | PGBD2     |
| 28809398           | Niculescu et al. 2017                          | Gene Expression                  | PGK1      |
| 28769055           | Tombacz et al. 2017                            | WES Study                        | PHF20     |
| 25178164           | Sokolowski et al. 2015                         | Review Article                   | PIK3C2A   |
| 28872639; 23958961 | Flory et al. 2017; Le-Niculescu et al. 2013    | Gene Expression; Gene Expression | PIK3C3    |
| 28809398           | Niculescu et al. 2017                          | Gene Expression                  | PIK3CA    |
| 28872639           | Flory et al. 2017                              | Gene Expression                  | PIK3CD    |

|                    |                                               |                                  |          |
|--------------------|-----------------------------------------------|----------------------------------|----------|
| 28809398           | Niculescu et al. 2017                         | Gene Expression                  | PIK3R1   |
| 28769055           | Tombacz et al. 2017                           | WES Study                        | PIK3R4   |
| 23958961           | Le-Niculescu et al. 2013                      | Gene Expression                  | PIP5K1B  |
| 28809398           | Niculescu et al. 2017                         | Gene Expression                  | PITHD1   |
| 28809398           | Niculescu et al. 2017                         | Gene Expression                  | PKP4     |
| 26079190           | Galfalvy et al. 2015                          | GWAS Catalog                     | PLCB1    |
| 28769055           | Tombacz et al. 2017                           | WES Study                        | PMCH     |
| 28769055           | Tombacz et al. 2017                           | WES Study                        | PMM2     |
| 21081163           | Fiori et al. 2012                             | Gene Expression                  | PMP22    |
| 28809398           | Niculescu et al. 2017                         | Gene Expression                  | POLR2D   |
| 28872639           | Flory et al. 2017                             | Gene Expression                  | POLR3GL  |
| 25178164           | Sokolowski et al. 2015                        | Review Article                   | POMC     |
| 28872639           | Flory et al. 2017                             | Gene Expression                  | PORCN    |
| 28809398           | Niculescu et al. 2017                         | Gene Expression                  | PPAP2B   |
| 29331709           | Bozorgmehr et al. 2018                        | Review Article                   | PPP1R1B  |
| 28872639           | Flory et al. 2017                             | Gene Expression                  | PPP2R5B  |
| 23958961           | Le-Niculescu et al. 2013                      | Gene Expression                  | PRCP     |
| 28769055           | Tombacz et al. 2017                           | WES Study                        | PRDM16   |
| 25178164           | Sokolowski et al. 2015                        | Review Article                   | PRDX6    |
| 25178164           | Sokolowski et al. 2015                        | Review Article                   | PRKACA   |
| 28769055           | Tombacz et al. 2017                           | WES Study                        | PRKAG2   |
| 28809398           | Niculescu et al. 2017                         | Gene Expression                  | PRKAR1A  |
| 28872639, 28809398 | Flory et al. 2017; Niculescu et al. 2017      | Gene Expression; Gene Expression | PRKAR2B  |
| 25178164           | Sokolowski et al. 2015                        | Review Article                   | PRKCA    |
| 28809398; 25178164 | Niculescu et al. 2017; Sokolowski et al. 2015 | Gene Expression; Review Article  | PRKCB    |
| 21041247           | Perlis et al. 2010                            | GWAS Catalog                     | PRKCE    |
| 25178164           | Sokolowski et al. 2015                        | Review Article                   | PRKCG    |
| 28872639           | Flory et al. 2017                             | Gene Expression                  | PRKCH    |
| 28809398           | Niculescu et al. 2017                         | Gene Expression                  | PRKCI    |
| 24964207           | Mullins et al. 2014                           | GWAS Catalog                     | PROM1    |
| 28769055           | Tombacz et al. 2017                           | WES Study                        | PRR27    |
| 28769055           | Tombacz et al. 2017                           | WES Study                        | PRSS56   |
| 28769055           | Tombacz et al. 2017                           | WES Study                        | PRTG     |
| 28769055           | Tombacz et al. 2017                           | WES Study                        | PSKH1    |
| 28872639           | Flory et al. 2017                             | Gene Expression                  | PSMA1    |
| 28872639           | Flory et al. 2017                             | Gene Expression                  | PSMA2    |
| 28872639           | Flory et al. 2017                             | Gene Expression                  | PSMB1    |
| 28872639           | Flory et al. 2017                             | Gene Expression                  | PSMB4    |
| 28872639           | Flory et al. 2017                             | Gene Expression                  | PSMD7    |
| 26079190           | Galfalvy et al. 2015                          | GWAS Catalog                     | PSME2    |
| 28809398           | Niculescu et al. 2017                         | Gene Expression                  | PSME4    |
| 28809398           | Niculescu et al. 2017                         | Gene Expression                  | PSNB4    |
| 25178164           | Sokolowski et al. 2015                        | Review Article                   | PTEN     |
| 28769055           | Tombacz et al. 2017                           | WES Study                        | PTGIS    |
| 28809398           | Niculescu et al. 2017                         | Gene Expression                  | PTK2     |
| 25178164           | Sokolowski et al. 2015                        | Review Article                   | PTPRR    |
| 25178164           | Sokolowski et al. 2015                        | Review Article                   | QKI      |
| 23958961           | Le-Niculescu et al. 2013                      | Gene Expression                  | R8M48    |
| 28769055           | Tombacz et al. 2017                           | WES Study                        | RAB36    |
| 28769055           | Tombacz et al. 2017                           | WES Study                        | RAB3GAP2 |
| 27721799           | Mirkovic et al. 2016                          | Review Article                   | RABAC1   |
| 28769055           | Tombacz et al. 2017                           | WES Study                        | RABGGTA  |
| 28872639           | Flory et al. 2017                             | Gene Expression                  | RAC3     |
| 23958961           | Le-Niculescu et al. 2013                      | Gene Expression                  | RAPH1    |
| 24964207           | Mullins et al. 2014                           | GWAS Catalog                     | RARRES2  |
| 28769055           | Tombacz et al. 2017                           | WES Study                        | RBM10    |
| 28769055           | Tombacz et al. 2017                           | WES Study                        | RBM12B   |
| 28809398           | Niculescu et al. 2017                         | Gene Expression                  | RBM3     |
| 28769055           | Tombacz et al. 2017                           | WES Study                        | RBMXL2   |
| 28769055           | Tombacz et al. 2017                           | WES Study                        | REER     |
| 28769055           | Tombacz et al. 2017                           | WES Study                        | REST     |
| 28769055           | Tombacz et al. 2017                           | WES Study                        | RGL4     |
| 25178164           | Sokolowski et al. 2015                        | Review Article                   | RGS18    |
| 29331709           | Bozorgmehr et al. 2018                        | Review Article                   | RGS2     |
| 25178164           | Sokolowski et al. 2015                        | Review Article                   | RGS4     |
| 22030708           | Menke et al. 2012                             | GWAS study not in Catalog        | RHEB     |
| 28809398           | Niculescu et al. 2017                         | Gene Expression                  | RIMS3    |
| 28809398           | Niculescu et al. 2017                         | Gene Expression                  | RNF6     |
| 28769055           | Tombacz et al. 2017                           | WES Study                        | RNU6-71P |
| 28769055           | Tombacz et al. 2017                           | WES Study                        | RP2      |
| 28809398           | Niculescu et al. 2017                         | Gene Expression                  | RPAP3    |
| 28769055           | Tombacz et al. 2017                           | WES Study                        | RPE      |

|          |                          |                           |           |
|----------|--------------------------|---------------------------|-----------|
| 28769055 | Tombacz et al. 2017      | WES Study                 | RPH3A     |
| 25917933 | Zai et al. 2015          | GWAS Catalog              | RPL37P6   |
| 28872639 | Flory et al. 2017        | Gene Expression           | RP56      |
| 28872639 | Flory et al. 2017        | Gene Expression           | RRAGA     |
| 25178164 | Sokolowski et al. 2015   | Review Article            | S100A13   |
| 25178164 | Sokolowski et al. 2015   | Review Article            | S100A8    |
| 21081163 | Fiori et al. 2012        | Gene Expression           | S100B     |
| 29331709 | Bozorgmehr et al. 2018   | Review Article            | SAT1      |
| 25178164 | Sokolowski et al. 2015   | Review Article            | SAT2      |
| 28769055 | Tombacz et al. 2017      | WES Study                 | SBF1      |
| 28809398 | Niculescu et al. 2017    | Gene Expression           | SCAF11    |
| 25178164 | Sokolowski et al. 2015   | Review Article            | SCD       |
| 29331709 | Bozorgmehr et al. 2018   | Review Article            | SC1A3     |
| 28769055 | Tombacz et al. 2017      | WES Study                 | SCLY      |
| 25178164 | Sokolowski et al. 2015   | Review Article            | SCN2B     |
| 27721799 | Mirkovic et al. 2016     | Review Article            | SCN8A     |
| 28809398 | Niculescu et al. 2017    | Gene Expression           | SECISBP2L |
| 25178164 | Sokolowski et al. 2015   | Review Article            | SELENBP1  |
| 28809398 | Niculescu et al. 2017    | Gene Expression           | SEPT8     |
| 28872639 | Flory et al. 2017        | Gene Expression           | SERPINF1  |
| 28809398 | Niculescu et al. 2017    | Gene Expression           | SET       |
| 22059935 | Galfalvy et al. 2013     | GWAS study not in Catalog | SFRS11    |
| 28872639 | Flory et al. 2017        | Gene Expression           | SHC3      |
| 28769055 | Tombacz et al. 2017      | WES Study                 | SHISA6    |
| 25073599 | Quintivano               | Methylation               | SKA2      |
| 28769055 | Tombacz et al. 2017      | WES Study                 | SKOR2     |
| 26666204 | Sokolowski et al. 2016   | GWAS                      | SLC19A2   |
| 29331709 | Bozorgmehr et al. 2018   | Review Article            | SLC1A2    |
| 21081163 | Fiori et al. 2012        | Gene Expression           | SLC1A3    |
| 28809398 | Niculescu et al. 2017    | Gene Expression           | SLC4A4    |
| 28809398 | Niculescu et al. 2017    | Gene Expression           | SLC5A3    |
| 25178164 | Sokolowski et al. 2015   | Review Article            | SLC6A1    |
| 29331709 | Bozorgmehr et al. 2018   | Review Article            | SLC6A2    |
| 25178164 | Sokolowski et al. 2015   | Review Article            | SLC6A3    |
| 27721799 | Mirkovic et al. 2016     | Review Article            | SLC6A4    |
| 21041247 | Perlis et al. 2010       | GWAS                      | SLC44     |
| 29331709 | Bozorgmehr et al. 2018   | Review Article            | SLIT2     |
| 28769055 | Tombacz et al. 2017      | WES Study                 | SMAD3     |
| 23958961 | Le-Niculescu et al. 2013 | Gene Expression           | SMARCA2   |
| 28769055 | Tombacz et al. 2017      | WES Study                 | SMARCC1   |
| 28809398 | Niculescu et al. 2017    | Gene Expression           | SMCR8     |
| 25178164 | Sokolowski et al. 2015   | Review Article            | SMOX      |
| 25178164 | Sokolowski et al. 2015   | Review Article            | SMS       |
| 21081163 | Fiori et al. 2012        | Gene Expression           | SNAP23    |
| 21081163 | Fiori et al. 2012        | Gene Expression           | SNAP25    |
| 21081163 | Fiori et al. 2012        | Gene Expression           | SNAP29    |
| 21081163 | Fiori et al. 2012        | Gene Expression           | SNPH      |
| 25178164 | Sokolowski et al. 2015   | Review Article            | SNTG2     |
| 28809398 | Niculescu et al. 2017    | Gene Expression           | SNX6      |
| 28809398 | Niculescu et al. 2017    | Gene Expression           | SOD2      |
| 28769055 | Tombacz et al. 2017      | WES Study                 | SOGA1     |
| 21041247 | Perlis et al. 2010       | GWAS Catalog              | SORBS1    |
| 28769055 | Tombacz et al. 2017      | WES Study                 | SORL1     |
| 21041247 | Perlis et al. 2010       | GWAS                      | SPACA6    |
| 28769055 | Tombacz et al. 2017      | WES Study                 | SPAG17    |
| 28809398 | Niculescu et al. 2017    | Gene Expression           | SPATA18   |
| 28769055 | Tombacz et al. 2017      | WES Study                 | SPATA31C2 |
| 28769055 | Tombacz et al. 2017      | WES Study                 | SPHKAP    |
| 28769055 | Tombacz et al. 2017      | WES Study                 | SPINK13   |
| 23958961 | Le-Niculescu et al. 2013 | Gene Expression           | SPON1     |
| 28809398 | Niculescu et al. 2017    | Gene Expression           | SPTBN1    |
| 22059935 | Galfalvy et al. 2013     | GWAS study not in Catalog | SPTLC1    |
| 28872639 | Flory et al. 2017        | Gene Expression           | SRC       |
| 28769055 | Tombacz et al. 2017      | WES Study                 | SRRM4     |
| 25178164 | Sokolowski et al. 2015   | Review Article            | SRSF11    |
| 28809398 | Niculescu et al. 2017    | Gene Expression           | SSR       |
| 25178164 | Sokolowski et al. 2015   | Review Article            | SST       |
| 28769055 | Tombacz et al. 2017      | WES Study                 | ST14      |
| 28769055 | Tombacz et al. 2017      | WES Study                 | STARD8    |
| 28769055 | Tombacz et al. 2017      | WES Study                 | STC2      |
| 26079190 | Galfalvy et al. 2015     | GWAS Catalog              | STK3      |
| 28769055 | Tombacz et al. 2017      | WES Study                 | STRA8     |

|                    |                                               |                                            |              |
|--------------------|-----------------------------------------------|--------------------------------------------|--------------|
| 28769055           | Tombacz et al. 2017                           | WES Study                                  | STX16-NPEPL1 |
| 21081163           | Fiori et al. 2012                             | Gene Expression                            | STX1A        |
| 21081163           | Fiori et al. 2012                             | Gene Expression                            | STXBP1       |
| 28809398           | Niculescu et al. 2017                         | Gene Expression                            | SUMF2        |
| 28769055           | Tombacz et al. 2017                           | WES Study                                  | SURF4        |
| 21081163           | Fiori et al. 2012                             | Gene Expression                            | SV2B         |
| 21081163           | Fiori et al. 2012                             | Gene Expression                            | SYN2         |
| 21081163           | Fiori et al. 2012                             | Gene Expression                            | SYNGR2       |
| 21081163           | Fiori et al. 2012                             | Gene Expression                            | SYNJ2        |
| 21081163           | Fiori et al. 2012                             | Gene Expression                            | SYNPO2       |
| 28809398           | Niculescu et al. 2017                         | Gene Expression                            | SYNPO2L      |
| 21081163           | Fiori et al. 2012                             | Gene Expression                            | SYPL         |
| 21081163           | Fiori et al. 2012                             | Gene Expression                            | SYT1         |
| 21081163           | Fiori et al. 2012                             | Gene Expression                            | SYT13        |
| 21081163           | Fiori et al. 2012                             | Gene Expression                            | SYT4         |
| 21081163           | Fiori et al. 2012                             | Gene Expression                            | SYT5         |
| 28769055           | Tombacz et al. 2017                           | WES Study                                  | SYTL3        |
| 29331709           | Bozorgmehr et al. 2018                        | Review Article                             | TAAR6        |
| 28769055           | Tombacz et al. 2017                           | WES Study                                  | TAB3         |
| 25178164           | Sokolowski et al. 2015                        | Review Article                             | TAC1         |
| 29331709           | Bozorgmehr et al. 2018                        | Review Article                             | TACR1        |
| 28769055           | Tombacz et al. 2017                           | WES Study                                  | TATDN2       |
| 25178164           | Sokolowski et al. 2015                        | Review Article                             | TBC1D1       |
| 25178164           | Sokolowski et al. 2015                        | Review Article                             | TBC1D25      |
| 28872639           | Flory et al. 2017                             | Gene Expression                            | TBL1X        |
| 28809398           | Niculescu et al. 2017                         | Gene Expression                            | TBL1XR1      |
| 29331709           | Bozorgmehr et al. 2018                        | Review Article                             | TBX19        |
| 26079190           | Galfalvy et al. 2015                          | GWAS Catalog                               | TBX20        |
| 28809398           | Niculescu et al. 2017                         | Gene Expression                            | TDG          |
| 28769055           | Tombacz et al. 2017                           | WES Study                                  | TECTA        |
| 28769055           | Tombacz et al. 2017                           | WES Study                                  | TFE3         |
| 28769055           | Tombacz et al. 2017                           | WES Study                                  | TG           |
| 25178164           | Sokolowski et al. 2015                        | Review Article                             | TGFB1        |
| 28769055           | Tombacz et al. 2017                           | WES Study                                  | TGIF2LY      |
| 28809398; 25178164 | Niculescu et al. 2017; Sokolowski et al. 2015 | Gene Expression; Review Article            | TGOLN2       |
| 29331709           | Bozorgmehr et al. 2018                        | Review Article                             | TH           |
| 23958961           | Le-Niculescu et al. 2013                      | Gene Expression                            | TIM1         |
| 28769055           | Tombacz et al. 2017                           | WES Study                                  | TIMP1        |
| 28872639           | Flory et al. 2017                             | Gene Expression                            | TIMP4        |
| 28809398           | Niculescu et al. 2017                         | Gene Expression                            | TM4SF1       |
| 28769055           | Tombacz et al. 2017                           | WES Study                                  | TMA16        |
| 21423239           | Willour et al. 2012                           | GWAS Catalog                               | TMEM132C     |
| 22030708           | Menke et al. 2012                             | GWAS study not in Catalog                  | TMEM138      |
| 28809398           | Niculescu et al. 2017                         | Gene Expression                            | TMEM254      |
| 28769055           | Tombacz et al. 2017                           | WES Study                                  | TMPRSS11F    |
| 25917933           | Zai et al. 2015                               | GWAS Catalog                               | TMX3         |
| 25178164           | Sokolowski et al. 2015                        | Review Article                             | TNF          |
| 29331709           | Bozorgmehr et al. 2018                        | Review Article                             | TNF-A        |
| 28769055           | Tombacz et al. 2017                           | WES Study                                  | TNFRSF11B    |
| 28769055           | Tombacz et al. 2017                           | WES Study                                  | TNS1         |
| 28769055           | Tombacz et al. 2017                           | WES Study                                  | TP53RK       |
| 28809398           | Niculescu et al. 2017                         | Gene Expression                            | TPD52        |
| 28769055           | Tombacz et al. 2017                           | WES Study                                  | TPGS2        |
| 27721799           | Mirkovic et al. 2016                          | Review Article                             | TPH1         |
| 27721799           | Mirkovic et al. 2016                          | Review Article                             | TPH2         |
| 28809398           | Niculescu et al. 2017                         | Gene Expression                            | TRAF3        |
| 28769055           | Tombacz et al. 2017                           | WES Study                                  | TRIM15       |
| 28809398           | Niculescu et al. 2017                         | Gene Expression                            | TRIM23       |
| 28769055           | Tombacz et al. 2017                           | WES Study                                  | TRO          |
| 28769055           | Tombacz et al. 2017                           | WES Study                                  | TSC2         |
| 28769055           | Tombacz et al. 2017                           | WES Study                                  | TSPAN6       |
| 28809398           | Niculescu et al. 2017                         | Gene Expression                            | TTBK1        |
| 28769055           | Tombacz et al. 2017                           | WES Study                                  | TTC28        |
| 28769055           | Tombacz et al. 2017                           | WES Study                                  | TTC34        |
| 25178164           | Sokolowski et al. 2015                        | Review Article                             | TUBA1A       |
| 22059935; 28809398 | Galfalvy et al. 2013; Niculescu et al. 2017   | GWAS study not in Catalog; Gene Expression | TUBGCP3      |
| 28769055           | Tombacz et al. 2017                           | WES Study                                  | TXLNA        |
| 28872639           | Flory et al. 2017                             | Gene Expression                            | UBC          |
| 28769055           | Tombacz et al. 2017                           | WES Study                                  | UBE2E3       |
| 23958961           | Le-Niculescu et al. 2013                      | Gene Expression                            | UCHL5        |
| 28809398           | Niculescu et al. 2017                         | Gene Expression                            | UOCC1        |
| 28769055           | Tombacz et al. 2017                           | WES Study                                  | VAC14        |

|                    |                                               |                                  |         |
|--------------------|-----------------------------------------------|----------------------------------|---------|
| 21081163; 28809398 | Fiori et al. 2012; Niculescu et al. 2017      | Gene Expression; Gene Expression | VAMP3   |
| 27721799           | Mirkovic et al. 2016                          | Review Article                   | VAMP4   |
| 29331709           | Bozorgmehr et al. 2018                        | Review Article                   | VEGFA   |
| 25178164           | Sokolowski et al. 2015                        | Review Article                   | VGF     |
| 25178164           | Sokolowski et al. 2015                        | Review Article                   | VIM     |
| 28809398           | Niculescu et al. 2017                         | Gene Expression                  | VIP     |
| 28809398           | Niculescu et al. 2017                         | Gene Expression                  | VPREB3  |
| 23958961           | Le-Niculescu et al. 2013                      | Gene Expression                  | VPS53   |
| 28809398           | Niculescu et al. 2017                         | Gene Expression                  | VTA1    |
| 28809398           | Niculescu et al. 2017                         | Gene Expression                  | WARS    |
| 28769055           | Tombacz et al. 2017                           | WES Study                        | WDR12   |
| 29331709           | Bozorgmehr et al. 2018                        | Review Article                   | WFS1    |
| 28872639           | Flory et al. 2017                             | Gene Expression                  | WIF1    |
| 28809398           | Niculescu et al. 2017                         | Gene Expression                  | WIPF3   |
| 28809398           | Niculescu et al. 2017                         | Gene Expression                  | WNK1    |
| 28872639           | Flory et al. 2017                             | Gene Expression                  | WNT1    |
| 28872639           | Flory et al. 2017                             | Gene Expression                  | WNT3    |
| 28809398           | Niculescu et al. 2017                         | Gene Expression                  | WWP2    |
| 28809398           | Niculescu et al. 2017                         | Gene Expression                  | XRCC5   |
| 28769055           | Tombacz et al. 2017                           | WES Study                        | YES1    |
| 29331709           | Bozorgmehr et al. 2018                        | Review Article                   | YWHAE   |
| 28809398; 25178164 | Niculescu et al. 2017; Sokolowski et al. 2015 | Gene Expression; Review Article  | YWHAH   |
| 28872639           | Flory et al. 2017                             | Gene Expression                  | YWHAQ   |
| 25178164           | Sokolowski et al. 2015                        | Review Article                   | YWHAZ   |
| 28769055           | Tombacz et al. 2017                           | WES Study                        | ZBTB49  |
| 28769055           | Tombacz et al. 2017                           | WES Study                        | ZCCHC2  |
| 28769055           | Tombacz et al. 2017                           | WES Study                        | ZEB2    |
| 28769055           | Tombacz et al. 2017                           | WES Study                        | ZFC3H1  |
| 25178164           | Sokolowski et al. 2015                        | Review Article                   | ZFP36   |
| 28809398           | Niculescu et al. 2017                         | Gene Expression                  | ZFYVE21 |
| 28809398           | Niculescu et al. 2017                         | Gene Expression                  | ZNF302  |
| 28769055           | Tombacz et al. 2017                           | WES Study                        | ZNF510  |
| 28809398           | Niculescu et al. 2017                         | Gene Expression                  | ZNF565  |
| 28769055           | Tombacz et al. 2017                           | WES Study                        | ZNF646  |
| 28769055           | Tombacz et al. 2017                           | WES Study                        | ZNF718  |
| 28809398           | Niculescu et al. 2017                         | Gene Expression                  | ZNF75D  |
| 25178164           | Sokolowski et al. 2015                        | Review Article                   | ZNF804A |
| 28769055           | Tombacz et al. 2017                           | WES Study                        | ZSCAN1  |

**Table S5.** Case characteristics of follow-up Utah suicides with significant SNP findings. No cases were related (out to 15<sup>th</sup> degree) to any case in the high risk family responsible for SGS evidence for the region containing that gene.

| Gene, SNP, N suicide cases                                 | % male                            | Avg. age at death (SD)     | Method of death <sup>a</sup>                                            | Relatedness among cases with minor allele                                                                                                                                                                |
|------------------------------------------------------------|-----------------------------------|----------------------------|-------------------------------------------------------------------------|----------------------------------------------------------------------------------------------------------------------------------------------------------------------------------------------------------|
| <i>SP110</i> , rs181058279, 5 heterozygotes                | 100% (5/5)                        | 33.20 (5.85)               | 20% gun (1/5)<br>60% other violent (3/5)<br>20% overdose (1/5)          | one 14 <sup>th</sup> degree relative pair                                                                                                                                                                |
| <i>AGBL2</i> , rs76215382, 61 heterozygotes, 2 homozygotes | <b>64.06% (41/64)<sup>b</sup></b> | 34.05 (16.44) <sup>c</sup> | 50% gun (32/64)<br>37.5% other violent (24/64)<br>12.5% overdose (8/64) | 23 relative pairs: two 5 <sup>th</sup> , one 7 <sup>th</sup> , one 8 <sup>th</sup> , six 9 <sup>th</sup> , four 10 <sup>th</sup> , three 12 <sup>th</sup> , four 13 <sup>th</sup> , two 14 <sup>th</sup> |
| <i>SUCLA2</i> , rs121908538, 9 heterozygotes               | 77.78% (7/9)                      | 30.94 (12.88)              | 33.3% gun (3/9)<br>55.5% other violent (5/9)<br>11.1% overdose (1/9)    | two pairs of 12 <sup>th</sup> degree relatives                                                                                                                                                           |
| <i>APH1B</i> , rs745918508, 23 heterozygotes               | 73.91% (17/23)                    | 37.91 (17.86) <sup>c</sup> | 56.5% gun (13/23)<br>34.8% other violent (8/23)<br>8.7% overdose (2/23) | two 11 <sup>th</sup> degree relative pairs; one 12 <sup>th</sup> degree relative pair                                                                                                                    |

<sup>a</sup> For comparison, in 4370 Utah suicides with DNA, rates of causes of death were 52.6% gun-related, 32.0% other violent methods, and 15.3% overdose.

<sup>b</sup> Significantly fewer males (41 of 64 cases) compared to the expected rate from all Utah suicides; chi-square (1 df) = 7.82, p=0.003.

<sup>c</sup> Distribution is significantly right-skewed.

**Additional information: diagnostic characteristics in cases for each of the four Table S5 SNPs appear in four additional tables on the following pages.** Cases from this follow-up sample of 4370 cases matched the initial 215 familial cases in the discovery sample well. Young age at death, increases in personality disorders, and increases in previous suicide attempts/suicidal ideation were therefore expected.

Gene:  
AGBL2

| Case id | sex | age | method                                   | Depr | BD | Anx | SCZ | Subst | Psnlty | ADHD | Sui-attempt | Sum | Totals                              | N Total | Percent |
|---------|-----|-----|------------------------------------------|------|----|-----|-----|-------|--------|------|-------------|-----|-------------------------------------|---------|---------|
| 29445   | M   | 21  | chest wound                              | 0    | 0  | 0   | 0   | 0     | 0      | 0    | 1           | 1   | depression                          | 30      | 0.47    |
| 33276   | F   | 17  | gun                                      | 0    | 0  | 0   | 0   | 0     | 0      | 0    | 0           | 0   | bipolar                             | 7       | 0.11    |
| 36087   | M   | 22  | gun                                      | 1    | 0  | 0   | 0   | 1     | 0      | 0    | 0           | 2   | anxiety                             | 16      | 0.25    |
| 42945   | M   | 17  | hanging                                  | 0    | 0  | 0   | 0   | 0     | 0      | 0    | 0           | 0   | psychosis/SCZ                       | 2       | 0.03    |
| 46829   | M   | 30  | gun                                      | 0    | 0  | 0   | 0   | 0     | 0      | 0    | 1           | 1   | subst. abuse                        | 9       | 0.14    |
| 47912   | M   | 15  | gun                                      | 0    | 0  | 0   | 0   | 0     | 0      | 0    | 1           | 1   | personality                         | 9       | 0.14    |
| 95743   | F   | 52  | hanging                                  | 1    | 0  | 1   | 0   | 0     | 0      | 0    | 0           | 2   | adhd                                | 5       | 0.08    |
| 117222  | F   | 18  | hanging                                  | 0    | 0  | 0   | 0   | 0     | 0      | 0    | 0           | 0   | attempt/ideation                    | 30      | 0.47    |
| 76063   | M   | 19  | gun                                      | 1    | 0  | 0   | 0   | 0     | 0      | 0    | 1           | 2   | 2 or more dx                        | 27      | 0.42    |
| 117227  | F   | 44  | overdose-<br>opioids-<br>antipsychotics  | 1    | 0  | 0   | 0   | 0     | 0      | 0    | 1           | 2   | 4 or more dx                        | 10      | 0.16    |
| 95789   | M   | 54  | gun                                      | 1    | 0  | 1   | 0   | 0     | 1      | 0    | 0           | 3   | no codes                            | 20      | 0.31    |
| 95795   | F   | 36  | hanging                                  | 1    | 0  | 1   | 0   | 1     | 0      | 1    | 1           | 5   |                                     |         |         |
| 117274  | F   | 59  | overdose-<br>narcotics-<br>hallucinogens | 1    | 0  | 1   | 0   | 0     | 0      | 0    | 0           | 2   | male                                | 41/64   | 0.64    |
| 95972   | F   | 54  | gun                                      | 0    | 0  | 0   | 0   | 0     | 0      | 0    | 0           | 0   | mean age                            |         | 34.05   |
| 84749   | M   | 20  | gun                                      | 0    | 0  | 0   | 0   | 0     | 0      | 0    | 1           | 1   | sd age                              |         | 16.44   |
| 85475   | M   | 41  | gun                                      | 0    | 0  | 0   | 0   | 0     | 0      | 0    | 0           | 0   |                                     |         |         |
| 85468   | F   | 37  | overdose-<br>narcotics-<br>opioids       | 1    | 0  | 0   | 0   | 0     | 0      | 0    | 1           | 2   | method:gun                          | 32      | 0.50    |
| 85649   | M   | 20  | gun                                      | 0    | 0  | 0   | 0   | 0     | 0      | 0    | 0           | 0   | method:od (includes<br>CO)          | 7       | 0.11    |
| 85816   | M   | 62  | gun                                      | 0    | 0  | 0   | 0   | 0     | 0      | 0    | 0           | 0   | method:hanging                      | 22      | 0.34    |
| 86803   | M   | 22  | gun                                      | 0    | 0  | 0   | 0   | 0     | 0      | 0    | 0           | 0   | method:other                        | 3       | 0.05    |
| 87337   | M   | 20  | hanging                                  | 0    | 0  | 0   | 0   | 0     | 0      | 1    | 0           | 1   | (stab wound, jump,<br>other trauma) |         |         |
| 87461   | M   | 17  | hanging                                  | 0    | 0  | 0   | 0   | 0     | 0      | 0    | 1           | 1   |                                     |         |         |
| 87990   | M   | 62  | gun                                      | 0    | 0  | 0   | 0   | 0     | 0      | 0    | 0           | 0   |                                     |         |         |
| 88785   | M   | 35  | hanging                                  | 0    | 0  | 0   | 0   | 0     | 0      | 0    | 1           | 1   |                                     |         |         |
| 89185   | F   | 17  | hanging                                  | 0    | 0  | 0   | 0   | 0     | 0      | 0    | 0           | 0   |                                     |         |         |
| 89434   | M   | 26  | gun                                      | 0    | 0  | 0   | 0   | 0     | 0      | 0    | 0           | 0   |                                     |         |         |
| 90923   | M   | 57  | gun                                      | 1    | 0  | 1   | 0   | 1     | 0      | 0    | 1           | 4   |                                     |         |         |
| 114023  | M   | 43  | gun                                      | 1    | 0  | 0   | 0   | 0     | 0      | 0    | 1           | 2   |                                     |         |         |
| 91755   | M   | 16  | gun                                      | 0    | 0  | 0   | 0   | 0     | 0      | 0    | 0           | 0   |                                     |         |         |
| 93534   | F   | 17  | jump from high<br>place                  | 1    | 1  | 1   | 0   | 0     | 1      | 0    | 1           | 5   |                                     |         |         |
| 93966   | M   | 22  | overdose-<br>narcotics-<br>alcohol       | 0    | 0  | 0   | 0   | 0     | 0      | 0    | 1           | 1   |                                     |         |         |
| 94810   | M   | 57  | hanging                                  | 1    | 1  | 0   | 0   | 0     | 1      | 1    | 1           | 5   |                                     |         |         |
| 95370   | M   | 28  | hanging                                  | 1    | 0  | 0   | 0   | 0     | 0      | 0    | 0           | 1   |                                     |         |         |

|        |   |    |                              |   |   |   |   |   |   |   |   |   |
|--------|---|----|------------------------------|---|---|---|---|---|---|---|---|---|
| 115003 | F | 21 | gun                          | 1 | 1 | 1 | 1 | 0 | 1 | 0 | 1 | 6 |
| 96568  | M | 28 | hanging                      | 0 | 0 | 0 | 0 | 0 | 0 | 0 | 0 | 0 |
| 97264  | F | 41 | hanging                      | 1 | 0 | 1 | 0 | 0 | 0 | 0 | 1 | 3 |
| 97870  | F | 34 | hanging                      | 1 | 1 | 1 | 0 | 0 | 1 | 0 | 1 | 5 |
| 98950  | F | 25 | hanging                      | 1 | 1 | 1 | 0 | 1 | 1 | 0 | 1 | 6 |
| 99143  | F | 29 | hanging                      | 1 | 0 | 0 | 0 | 0 | 1 | 0 | 1 | 3 |
| 117317 | M | 62 | gun                          | 0 | 0 | 0 | 0 | 1 | 0 | 0 | 0 | 1 |
| 100781 | M | 17 | gun                          | 0 | 0 | 0 | 0 | 0 | 0 | 1 | 0 | 1 |
| 101347 | M | 14 | gun                          | 0 | 0 | 0 | 0 | 0 | 0 | 0 | 1 | 1 |
| 101629 | M | 56 | poisoning-CO                 | 0 | 0 | 0 | 0 | 0 | 0 | 1 | 0 | 1 |
| 101811 | F | 56 | gun                          | 0 | 0 | 0 | 0 | 0 | 0 | 0 | 0 | 0 |
| 101918 | M | 31 | hanging                      | 0 | 0 | 0 | 0 | 0 | 0 | 0 | 0 | 0 |
| 102189 | F | 20 | hanging                      | 1 | 0 | 0 | 0 | 0 | 0 | 0 | 1 | 2 |
| 102686 | M | 82 | gun                          | 0 | 0 | 1 | 0 | 0 | 0 | 0 | 0 | 1 |
| 103224 | M | 60 | gun                          | 0 | 0 | 0 | 0 | 0 | 0 | 0 | 0 | 0 |
| 103353 | M | 32 | hanging                      | 0 | 0 | 0 | 0 | 0 | 0 | 0 | 0 | 0 |
| 103666 | M | 25 | hanging                      | 1 | 1 | 1 | 1 | 1 | 1 | 0 | 1 | 7 |
| 104587 | M | 51 | gun                          | 1 | 0 | 0 | 0 | 0 | 0 | 0 | 0 | 1 |
| 104714 | F | 40 | hanging                      | 1 | 0 | 1 | 0 | 1 | 0 | 0 | 1 | 4 |
| 105692 | M | 15 | gun                          | 1 | 0 | 0 | 0 | 0 | 0 | 0 | 1 | 2 |
| 105841 | M | 32 | gun                          | 1 | 1 | 1 | 0 | 1 | 1 | 0 | 1 | 6 |
| 117351 | F | 60 | overdose-<br>antidepressants | 1 | 0 | 0 | 0 | 0 | 0 | 0 | 0 | 1 |
| 106770 | F | 32 | poisoning-CO                 | 1 | 0 | 0 | 0 | 0 | 0 | 0 | 1 | 2 |
| 117357 | M | 28 | gun                          | 0 | 0 | 0 | 0 | 0 | 0 | 0 | 0 | 0 |
| 109312 | F | 16 | gun                          | 0 | 0 | 0 | 0 | 0 | 0 | 0 | 0 | 0 |
| 109862 | F | 51 | hanging                      | 1 | 0 | 0 | 0 | 1 | 0 | 0 | 0 | 2 |
| 109956 | F | 31 | gun                          | 1 | 0 | 1 | 0 | 0 | 0 | 0 | 1 | 3 |
| 117366 | M | 18 | gun                          | 1 | 0 | 1 | 0 | 0 | 0 | 0 | 1 | 3 |
| 112061 | M | 35 | gun                          | 0 | 0 | 0 | 0 | 0 | 0 | 0 | 0 | 0 |
| 113906 | M | 23 | hanging                      | 1 | 0 | 0 | 0 | 0 | 0 | 0 | 1 | 2 |
| 114189 | M | 37 | blunt force<br>trauma        | 0 | 0 | 0 | 0 | 0 | 0 | 0 | 0 | 0 |



Gene:  
APH1B

| Case id | sex | age | method                         | Depr | BD | Anx | SCZ | Subst | Psnlty | ADHD | Sui-attempt | Sum | Totals           | N_Total | Percent |
|---------|-----|-----|--------------------------------|------|----|-----|-----|-------|--------|------|-------------|-----|------------------|---------|---------|
| 27629   | F   | 17  | overdose-stimulants-otherdrugs | 1    | 0  | 0   | 0   | 0     | 0      | 0    | 1           | 2   | depression       | 9       | 0.39    |
| 32989   | M   | 23  | gun                            | 1    | 1  | 0   | 0   | 0     | 0      | 0    | 0           | 2   | bipolar          | 3       | 0.13    |
| 38885   | F   | 32  | overdose-opioids-methadone     | 0    | 0  | 0   | 0   | 0     | 0      | 0    | 0           | 0   | anxiety          | 3       | 0.13    |
| 41970   | M   | 16  | hanging                        | 1    | 0  | 0   | 0   | 0     | 0      | 0    | 0           | 1   | psychosis        | 0       | 0.00    |
| 46301   | M   | 48  | gun                            | 0    | 0  | 0   | 0   | 0     | 0      | 0    | 0           | 0   | subst. abuse     | 3       | 0.13    |
| 78440   | F   | 33  | gun                            | 1    | 0  | 0   | 0   | 0     | 1      | 0    | 1           | 3   | personality      | 3       | 0.13    |
| 95972   | F   | 54  | gun                            | 0    | 0  | 0   | 0   | 0     | 0      | 0    | 0           | 0   | ADHD             | 2       | 0.09    |
| 84261   | M   | 46  | hanging                        | 0    | 0  | 0   | 0   | 0     | 0      | 0    | 0           | 0   | attempt/ideation | 6       | 0.26    |
| 89530   | M   | 71  | gun                            | 1    | 0  | 1   | 0   | 0     | 0      | 0    | 0           | 2   | 2 or more dx     | 8       | 0.35    |
| 89759   | M   | 46  | hanging                        | 0    | 1  | 0   | 0   | 1     | 1      | 0    | 1           | 4   | 4 or more dx     | 5       | 0.22    |
| 89761   | M   | 19  | gun                            | 0    | 0  | 0   | 0   | 0     | 0      | 0    | 0           | 0   | No codes         | 11      | 0.48    |
| 90772   | M   | 56  | gun                            | 0    | 0  | 0   | 0   | 0     | 0      | 0    | 0           | 0   |                  |         |         |
| 93400   | F   | 18  | hanging                        | 0    | 0  | 0   | 0   | 0     | 0      | 0    | 0           | 0   | males            | 17      | 0.74    |
| 97591   | M   | 30  | hanging                        | 1    | 0  | 0   | 0   | 0     | 0      | 1    | 1           | 3   | avg age          |         | 37.91   |
| 117306  | M   | 28  | gun                            | 1    | 0  | 0   | 0   | 0     | 0      | 0    | 0           | 1   | sd age           |         | 17.86   |
| 100016  | M   | 16  | hanging                        | 0    | 0  | 0   | 0   | 0     | 0      | 0    | 0           | 0   |                  |         |         |
| 102510  | M   | 18  | hanging                        | 0    | 0  | 0   | 0   | 0     | 0      | 0    | 0           | 0   | method:gun       | 13      | 0.57    |
| 103553  | M   | 59  | gun                            | 1    | 0  | 1   | 0   | 0     | 0      | 0    | 1           | 3   | method:od        | 2       | 0.09    |
| 105153  | F   | 52  | gun                            | 0    | 0  | 0   | 0   | 0     | 0      | 0    | 0           | 0   | method:hanging   | 7       | 0.30    |
| 105841  | M   | 32  | gun                            | 1    | 1  | 1   | 0   | 1     | 1      | 0    | 1           | 6   | method:other     | 1       | 0.04    |
| 108968  | M   | 74  | gun                            | 0    | 0  | 0   | 0   | 1     | 0      | 0    | 0           | 1   | (stab wound)     |         |         |
| 112061  | M   | 35  | gun                            | 0    | 0  | 0   | 0   | 0     | 0      | 1    | 0           | 1   |                  |         |         |
| 113614  | M   | 49  | stab wound of chest            | 0    | 0  | 0   | 0   | 0     | 0      | 0    | 0           | 0   |                  |         |         |

Gene:  
**SUCLA2**

| Case id | sex | age | method            | Depr | BD | Anx | SCZ | Subst | Psnlty | ADHD | Sui-attempt | Sum | Totals           | N_Total | Percent |
|---------|-----|-----|-------------------|------|----|-----|-----|-------|--------|------|-------------|-----|------------------|---------|---------|
| 38884   | M   | 36  | hanging           | 0    | 0  | 0   | 0   | 0     | 0      | 0    | 0           | 0   | depression       | 2       | 0.22    |
| 40128   | F   | 18  | hanging           | 0    | 0  | 0   | 0   | 0     | 0      | 0    | 0           | 0   | bipolar          | 1       | 0.11    |
| 42052   | M   | 42  | poisoning-cyanide | 0    | 0  | 0   | 0   | 0     | 0      | 0    | 0           | 0   | psychosis        | 0       | 0.00    |
| 89185   | F   | 17  | hanging           | 0    | 0  | 0   | 0   | 0     | 0      | 0    | 0           | 0   | subst. abuse     | 1       | 0.11    |
| 90067   | M   | 53  | gun               | 1    | 1  | 1   | 0   | 0     | 0      | 0    | 1           | 4   | personality      | 0       | 0.00    |
| 90767   | M   | 41  | hanging           | 0    | 0  | 0   | 0   | 1     | 0      | 0    | 0           | 1   | attempt/ideation | 3       | 0.33    |
| 97703   | M   | 20  | gun               | 0    | 0  | 0   | 0   | 0     | 0      | 0    | 1           | 1   | 2 or more        | 2       | 0.22    |
| 98236   | M   | 31  | gun               | 1    | 0  | 1   | 0   | 0     | 0      | 0    | 1           | 3   | 4 or more        | 1       | 0.11    |
| 104982  | M   | 21  | hanging           | 0    | 0  | 0   | 0   | 0     | 0      | 0    | 0           | 0   | no codes         | 5       | 0.56    |
|         |     |     |                   |      |    |     |     |       |        |      |             |     |                  |         |         |
|         |     |     |                   |      |    |     |     |       |        |      |             |     | males            | 7       | 0.78    |
|         |     |     |                   |      |    |     |     |       |        |      |             |     | avg age          |         | 31.00   |
|         |     |     |                   |      |    |     |     |       |        |      |             |     | sd age           |         | 12.83   |
|         |     |     |                   |      |    |     |     |       |        |      |             |     |                  |         |         |
|         |     |     |                   |      |    |     |     |       |        |      |             |     | method:gun       | 3       | 0.33    |
|         |     |     |                   |      |    |     |     |       |        |      |             |     | method:od        | 1       | 0.11    |
|         |     |     |                   |      |    |     |     |       |        |      |             |     | method:hanging   | 5       | 0.56    |

gene:  
SP110

| Case id | sex | age | method                                | Depr | BD | Anx | SCZ | Subst | Psnlty | ADHD | Sui-attempt | Sum | Totals           | N_Total | Percent |
|---------|-----|-----|---------------------------------------|------|----|-----|-----|-------|--------|------|-------------|-----|------------------|---------|---------|
| 31426   | M   | 26  | head injury;<br>blunt force<br>trauma | 1    | 0  | 0   | 0   | 0     | 0      | 0    | 1           | 2   | depression       | 2       | 0.40    |
| 85481   | M   | 39  | gun                                   | 0    | 0  | 0   | 0   | 0     | 0      | 0    | 0           | 0   | bipolar          | 0       | 0.00    |
| 87902   | M   | 29  | hanging                               | 1    | 0  | 0   | 0   | 0     | 1      | 1    | 0           | 3   | anxiety          | 0       | 0.00    |
| 95049   | M   | 33  | CO poisoning                          | 0    | 0  | 0   | 0   | 0     | 0      | 0    | 0           | 0   | psychosis/SCZ    | 0       | 0.00    |
| 102878  | M   | 39  | hanging                               | 0    | 0  | 0   | 0   | 0     | 0      | 0    | 0           | 0   | subst.abuse      | 0       | 0.00    |
|         |     |     |                                       |      |    |     |     |       |        |      |             |     | personality      | 1       | 0.20    |
|         |     |     |                                       |      |    |     |     |       |        |      |             |     | ADHD             | 1       | 0.20    |
|         |     |     |                                       |      |    |     |     |       |        |      |             |     | attempt/ideation | 1       | 0.20    |
|         |     |     |                                       |      |    |     |     |       |        |      |             |     | 2 or more        | 2       | 0.40    |
|         |     |     |                                       |      |    |     |     |       |        |      |             |     | no codes         | 3       | 0.60    |
|         |     |     |                                       |      |    |     |     |       |        |      |             |     | Males            | 5       | 1.00    |
|         |     |     |                                       |      |    |     |     |       |        |      |             |     | avg age          |         | 33.20   |
|         |     |     |                                       |      |    |     |     |       |        |      |             |     | sd age           |         | 5.85    |
|         |     |     |                                       |      |    |     |     |       |        |      |             |     | method:gun       | 1       | 0.20    |
|         |     |     |                                       |      |    |     |     |       |        |      |             |     | method:od        | 1       | 0.20    |
|         |     |     |                                       |      |    |     |     |       |        |      |             |     | method:hanging   | 2       | 0.40    |
|         |     |     |                                       |      |    |     |     |       |        |      |             |     | method:other     | 1       | 0.20    |
|         |     |     |                                       |      |    |     |     |       |        |      |             |     | (head injury)    |         |         |

## References appearing in the Supplementary material

- 1 Schosser A, Butler AW, Ising M, Perroud N, Uher R, Ng MY *et al.* Genomewide association scan of suicidal thoughts and behaviour in major depression. *PLoS One* 2011; **6**. doi:10.1371/journal.pone.0020690.
- 2 Fullerton JM, Willis-Owen SAG, Yalcin B, Shifman S, Copley RR, Miller SR *et al.* Human-Mouse Quantitative Trait Locus Concordance and the Dissection of a Human Neuroticism Locus. *Biol Psychiatry* 2008; **63**: 874–883.
- 3 Xie Z, Chan EC, Druey KM. R4 Regulator of G Protein Signaling (RGS) Proteins in Inflammation and Immunity. *AAPS J* 2016; **18**: 294–304.
- 4 Galfalvy H, Haghghi F, Hodgkinson C, Goldman D, Oquendo MA, Burke A *et al.* A genome-wide association study of suicidal behavior. *Am J Med Genet Part B Neuropsychiatr Genet* 2015; **168**: 557–563.
- 5 Chen X, Chen X, Xu Y, Yang W, Wu N, Ye H *et al.* Association of six CpG-SNPs in the inflammation-related genes with coronary heart disease. *Hum Genomics* 2016; **10**. doi:10.1186/s40246-016-0067-1.
- 6 Casado PL, Aguiar DP, Costa LC, Fonseca MA, Vieira TCS, Alvim-Pereira CCK *et al.* Different contribution of BRINP3 gene in chronic periodontitis and peri-implantitis: A cross-sectional study. *BMC Oral Health* 2015; **15**. doi:10.1186/s12903-015-0018-6.
- 7 Smith PJ, Levine AP, Dunne J, Guilhamon P, Turmaine M, Sewell GW *et al.* Mucosal transcriptomics implicates under expression of BRINP3 in the pathogenesis of ulcerative colitis. *Inflamm Bowel Dis* 2014; **20**: 1802–1812.
- 8 Wang J, Campbell IL, Zhang H. Systemic interferon- $\alpha$  regulates interferon-stimulated genes in the central nervous system. *Mol Psychiatry* 2008; **13**: 293–301.
- 9 Hoyo-Becerra C, Huebener A, Trippler M, Lutterbeck M, Liu ZJ, Truebner K *et al.* Concomitant interferon alpha stimulation and TLR3 activation induces neuronal expression of depression-related genes that are elevated in the brain of suicidal persons. *PLoS One* 2013; **8**. doi:10.1371/journal.pone.0083149.
- 10 Liu Y, Ramot Y, Torrelo A, Paller AS, Si N, Babay S *et al.* Mutations in proteasome subunit  $\beta$  type 8 cause chronic atypical neutrophilic dermatosis with lipodystrophy and elevated temperature with evidence of genetic and phenotypic heterogeneity. *Arthritis Rheum* 2012; **64**: 895–907.
- 11 Chmielewski S, Piaszyk-Borychowska A, Wesoly J, Bluysen HAR. STAT1 and IRF8 in Vascular Inflammation and Cardiovascular Disease: Diagnostic and Therapeutic Potential. *Int Rev Immunol* 2016; **35**: 434–454.
- 12 Chen Z, Guo Z, Ma J, Liu F, Gao C, Liu S *et al.* STAT1 single nucleotide polymorphisms and susceptibility to immune thrombocytopenia. *Autoimmunity* 2015; **48**: 305–312.
- 13 Zimmerman O, Rosen LB, Swamydas M, Ferre EMN, Natarajan M, van de Veerdonk F *et al.* Autoimmune regulator deficiency results in a decrease in STAT1 levels in human monocytes. *Front Immunol* 2017; **8**. doi:10.3389/fimmu.2017.00820.
- 14 Sequeira A, Mamdani F, Ernst C, Vawter MP, Bunney WE, Lebel V *et al.* Global brain gene expression analysis links Glutamatergic and GABAergic alterations to suicide and major depression. *PLoS One* 2009; **4**. doi:10.1371/journal.pone.0006585.
- 15 Xu FF, Huang Y, Wang XQ, Qiu YH, Peng YP. Modulation of immune function by glutamatergic neurons in the cerebellar interposed nucleus via hypothalamic and sympathetic pathways. *Brain Behav Immun* 2014; **38**: 263–271.
- 16 Mitjans M, Arias B, Jiménez E, Goikolea JM, Sáiz PA, García-Portilla MP *et al.* Exploring Genetic Variability at PI, GSK3, HPA, and Glutamatergic Pathways in Lithium Response: Association with IMPA2, INPP1, and GSK3B Genes. *J Clin Psychopharmacol* 2015; **35**: 600–604.
- 17 Lindén M, Ramírez Sepúlveda JI, James T, Thorlacius GE, Brauner S, Gómez-Cabrero D *et al.* Sex influences eQTL effects of SLE and Sjögren’s syndrome-associated genetic polymorphisms. *Biol Sex Differ* 2017; **8**. doi:10.1186/s13293-017-0153-7.
- 18 Niculescu AB, Le-Niculescu H, Levey DF, Phalen PL, Dainton HL, Roseberry K *et al.* Precision medicine for suicidality: From universality to subtypes and personalization. *Mol Psychiatry* 2017; **22**: 1250–1273.
- 19 Menke A, Domschke K, Czamara D, Klengel T, Hennings J, Lucae S *et al.* Genome-wide association study of antidepressant treatment-emergent suicidal ideation. *Neuropsychopharmacology* 2012; **37**: 797–807.
- 20 Harraz MM, Snyder SH. Antidepressant Actions of Ketamine Mediated by the Mechanistic Target of Rapamycin, Nitric Oxide, and Rheb. *Neurotherapeutics*. 2017; **14**: 728–733.
- 21 Li K, Zhang Y, Liang KY, Xu S, Zhou XJ, Tan K *et al.* Rheb1 deletion in myeloid cells aggravates OVA-induced allergic

- inflammation in mice. *Sci Rep* 2017; **7**. doi:10.1038/srep42655.
- 22 Tombácz D, Maróti Z, Kalmár T, Csabai Z, Balázs Z, Takahashi S *et al*. High-Coverage Whole-Exome Sequencing Identifies Candidate Genes for Suicide in Victims with Major Depressive Disorder. *Sci Rep* 2017; **7**: 1–11.
- 23 Shen C, Liu L, Jiang Z, Zheng X, Meng L, Yin X *et al*. Four genetic variants interact to confer susceptibility to atopic dermatitis in Chinese Han population. *Mol Genet Genomics* 2015; **290**: 1493–8.
- 24 Gao L, Emond MJ, Louie T, Cheadle C, Berger AE, Rafaels N *et al*. Identification of Rare Variants in ATP8B4 as a Risk Factor for Systemic Sclerosis by Whole-Exome Sequencing. *Arthritis Rheumatol* 2016; **68**: 191–200.
- 25 Rujescu D, Giegling I, Mandelli L, Schneider B, Hartmann AM, Schnabel A *et al*. NOS-I and -III gene variants are differentially associated with facets of suicidal behavior and aggression-related traits. *Am J Med Genet Part B Neuropsychiatr Genet* 2008; **147**: 42–48.
- 26 Kanwar JR, Kanwar RK, Burrow H, Baratchi S. Recent advances on the roles of NO in cancer and chronic inflammatory disorders. *Curr Med Chem* 2009; **16**: 2373–94.
- 27 Choi K, Le T, Xing G, Johnson LR, Ursano RJ. Analysis of Kinase Gene Expression in the Frontal Cortex of Suicide Victims: Implications of Fear and Stress†. *Front Behav Neurosci* 2011; **5**. doi:10.3389/fnbeh.2011.00046.
- 28 Bavley CC, Fischer DK, Rizzo BK, Rajadhyaksha AM. Cav1.2 channels mediate persistent chronic stress-induced behavioral deficits that are associated with prefrontal cortex activation of the p25/Cdk5-gluocorticoid receptor pathway. *Neurobiol Stress* 2017; **7**: 27–37.
- 29 Song H, Kim W, Choi JH, Kim SH, Lee D, Park CH *et al*. Stress-induced nuclear translocation of CDK5 suppresses neuronal death by downregulating ERK activation via VRK3 phosphorylation. *Sci Rep* 2016; **6**. doi:10.1038/srep28634.
- 30 Quintanilla RA, Orellana DI, González-Billault C, Maccioni RB. Interleukin-6 induces Alzheimer-type phosphorylation of tau protein by deregulating the cdk5/p35 pathway. *Exp Cell Res* 2004; **295**: 245–257.
- 31 Kékesi KA, Juhász G, Simor A, Gulyássy P, Szego ÉM, Hunyadi-Gulyás É *et al*. Altered Functional Protein Networks in the Prefrontal Cortex and Amygdala of Victims of Suicide. *PLoS One* 2012; **7**. doi:10.1371/journal.pone.0050532.
- 32 Martins-De-Souza D, Gattaz WF, Schmitt A, Rewerts C, Maccarrone G, Dias-Neto E *et al*. Prefrontal cortex shotgun proteome analysis reveals altered calcium homeostasis and immune system imbalance in schizophrenia. *Eur Arch Psychiatry Clin Neurosci* 2009; **259**: 151–163.
- 33 Lucotte B, Tajhizi M, Alkhatib D, Samuelsson EB, Wiehager B, Schedin-Weiss S *et al*. Stress Conditions Increase Vimentin Cleavage by Omi/HtrA2 Protease in Human Primary Neurons and Differentiated Neuroblastoma Cells. *Mol Neurobiol* 2015; **52**: 1077–1092.
- 34 Wegner N, Lundberg K, Kinloch A, Fisher B, Malmström V, Feldmann M *et al*. Autoimmunity to specific citrullinated proteins gives the first clues to the etiology of rheumatoid arthritis. *Immunol. Rev.* 2010; **233**: 34–54.
- 35 Folmsbee SS, Gottardi CJ. Cardiomyocytes of the heart and pulmonary veins: Novel contributors to asthma? *Am. J. Respir. Cell Mol. Biol.* 2017; **57**: 512–518.
- 36 Flory JD, Donohue D, Muhie S, Yang R, Miller SA, Hammamieh R *et al*. Gene expression associated with suicide attempts in US veterans. *Transl Psychiatry* 2017; **7**. doi:10.1038/tp.2017.179.
- 37 Watanabe Y, Fujiyama A, Ichiba Y, Hattori M, Yada T, Sakaki Y *et al*. Chromosome-wide assessment of replication timing for human chromosomes 11q and 21q: disease-related genes in timing-switch regions. *Hum Mol Genet* 2002; **11**: 13–21.
- 38 Kerns D, Vong GS, Barley K, Dracheva S, Katsel P, Casaccia P *et al*. Gene expression abnormalities and oligodendrocyte deficits in the internal capsule in schizophrenia. *Schizophr Res* 2010; **120**: 150–158.
- 39 Riestler A, Spyroglou A, Neufeld-Cohen A, Chen A, Beuschlein F. Urocortin-dependent effects on adrenal morphology, growth, and expression of steroidogenic enzymes in vivo. *J Mol Endocrinol* 2012; **48**: 159–167.
- 40 Katoh M, Katoh M. STAT3-induced WNT5A signaling loop in embryonic stem cells, adult normal tissues, chronic persistent inflammation, rheumatoid arthritis and cancer (Review). *Int. J. Mol. Med.* 2007; **19**: 273–278.
- 41 Bani-Fatemi A, Howe AS, Matmari M, Koga A, Zai C, Strauss J *et al*. Interaction between methylation and CpG single-nucleotide polymorphisms in the HTR2A gene: Association analysis with suicide attempt in schizophrenia. *Neuropsychobiology* 2016; **73**: 10–15.
- 42 Höfer P, Schosser A, Calati R, Serretti A, Massat I, Kocbas NA *et al*. The impact of serotonin receptor 1A and 2A gene polymorphisms and interactions on suicide attempt and suicide risk in depressed patients with insufficient

- response to treatment - A European multicentre study. *Int Clin Psychopharmacol* 2016; **31**: 1–7.
- 43 McMahon FJ, Buervenich S, Charney D, Lipsky R, Rush AJ, Wilson AF *et al*. Variation in the Gene Encoding the Serotonin 2A Receptor Is Associated with Outcome of Antidepressant Treatment. *Am J Hum Genet* 2006; **78**: 804–814.
- 44 Idzko M, Panther E, Stratz C, Müller T, Bayer H, Zissel G *et al*. The serotonergic receptors of human dendritic cells: identification and coupling to cytokine release. *J Immunol* 2004; **172**: 6011–9.
- 45 Takata Y, Hamada D, Miyatake K, Nakano S, Shinomiya F, Scafe CR *et al*. Genetic association between the PRKCH gene encoding protein kinase C $\alpha$  isozyme and rheumatoid arthritis in the Japanese population. *Arthritis Rheum* 2007; **56**: 30–42.
- 46 Starnawska A, Demontis D, McQuillin A, O’Brien NL, Staunstrup NH, Mors O *et al*. Hypomethylation of FAM63B in bipolar disorder patients. *Clin Epigenetics* 2016; **8**: 1–6.
- 47 Goes FS, Mcgrath J, Avramopoulos D, Wolynec P, Pirooznia M, Ruczinski I *et al*. Genome-wide association study of schizophrenia in Ashkenazi Jews. *Am J Med Genet Part B Neuropsychiatr Genet* 2015; **168**: 649–659.
- 48 Hesselbrock V, Dick D, Hesselbrock M, Foroud T, Schuckit M, Edenberg H *et al*. The Search for Genetic Risk Factors Associated With Suicidal Behavior. *Alcohol Clin Exp Res* 2004; **28**: 70S–76S.
- 49 Zubenko GS, Maher BS, Hughes HB, Zubenko WN, Scott Stiffler J, Marazita ML. Genome-wide linkage survey for genetic loci that affect the risk of suicide attempts in families with recurrent, early-onset, major depression. *Am J Med Genet* 2004; **129B**: 47–54.
- 50 Willour VL, Zandi PP, Badner JA, Steele J, Miao K, Lopez V *et al*. Attempted Suicide in Bipolar Disorder Pedigrees: Evidence for Linkage to 2p12. *Biol Psychiatry* 2007; **61**: 725–727.
- 51 Butler AW, Breen G, Tozzi F, Craddock N, Gill M, Korszun A *et al*. A genomewide linkage study on suicidality in major depressive disorder confirms evidence for linkage to 2p12. *Am J Med Genet Part B Neuropsychiatr Genet* 2010; **153**: 1465–1473.
- 52 Cheng R, Juo SH, Loth JE, Nee J, Iossifov I, Blumenthal R *et al*. Genome-wide linkage scan in a large bipolar disorder sample from the National Institute of Mental Health genetics initiative suggests putative loci for bipolar disorder, psychosis, suicide, and panic disorder. *Mol Psychiatry* 2006; **11**: 252–260.
